# Supplementary material for: Reactivities of phosphaalkynes towards diverse bis-silylenes
Source: Royal Society of Chemistry journal article supplement (doi:10.1039/d4dt01367k), 2024-01-01
Supplement: d4dt01367k1.pdf [file d4dt01367k1.pdf]

## Reactivities of phosphalkynes towards diverse bis-silylenes

Xiaofei Sun,<sup>[a]</sup> Da Jin,<sup>[a]</sup> Stefanie Maier,<sup>[a]</sup> Alexander Hinz,<sup>[a]</sup> P. W. Roesky\*<sup>[a,b]</sup>

[a] Institute of Inorganic Chemistry, Karlsruhe Institute of Technology (KIT), Kaiserstr. 12, 76131, Karlsruhe, Germany.

[b] Institute for Nanotechnology, Karlsruhe Institute of Technology (KIT), Kaiserstr. 12, 76131, Karlsruhe, Germany..

### Table of Contents

|                                         |     |
|-----------------------------------------|-----|
| I. NMR spectra .....                    | S2  |
| II. IR spectra .....                    | S9  |
| III. X-ray crystallography .....        | S11 |
| III.1 General methods .....             | S11 |
| III.2 Summary of crystal data .....     | S12 |
| III.3 Crystal structures .....          | S13 |
| IV. Quantum chemical calculations ..... | S16 |
| IV.1 Reaction pathway .....             | S16 |
| IV.2 Optimised Structures .....         | S17 |
| IV.2 Int0 .....                         | S17 |
| IV.2 Int0 - PC <sup>t</sup> Bu .....    | S20 |
| IV.2 Int1 .....                         | S21 |
| IV.2 Int2 .....                         | S25 |
| IV.2 Int3 .....                         | S28 |
| IV.2 Int4 .....                         | S32 |
| IV.2 Int5 .....                         | S36 |
| IV.2 Int6 .....                         | S40 |
| IV.2 TS 1-2 C .....                     | S44 |
| IV.2 TS 1-2 P .....                     | S48 |
| IV.2 TS 2-3 .....                       | S52 |
| IV.2 TS 0-4 .....                       | S56 |
| IV.2 TS 1-5 .....                       | S59 |
| IV.2 TS 2-6 .....                       | S63 |
| IV.2 TS 6-3 .....                       | S67 |
| IV.2 Int2 – isomer 2 .....              | S71 |
| V. References .....                     | S76 |

## I. NMR spectra

rsun191226\_XF454C\_SiFeSi\_tBuCP-cryst-10mg-1.4.fid

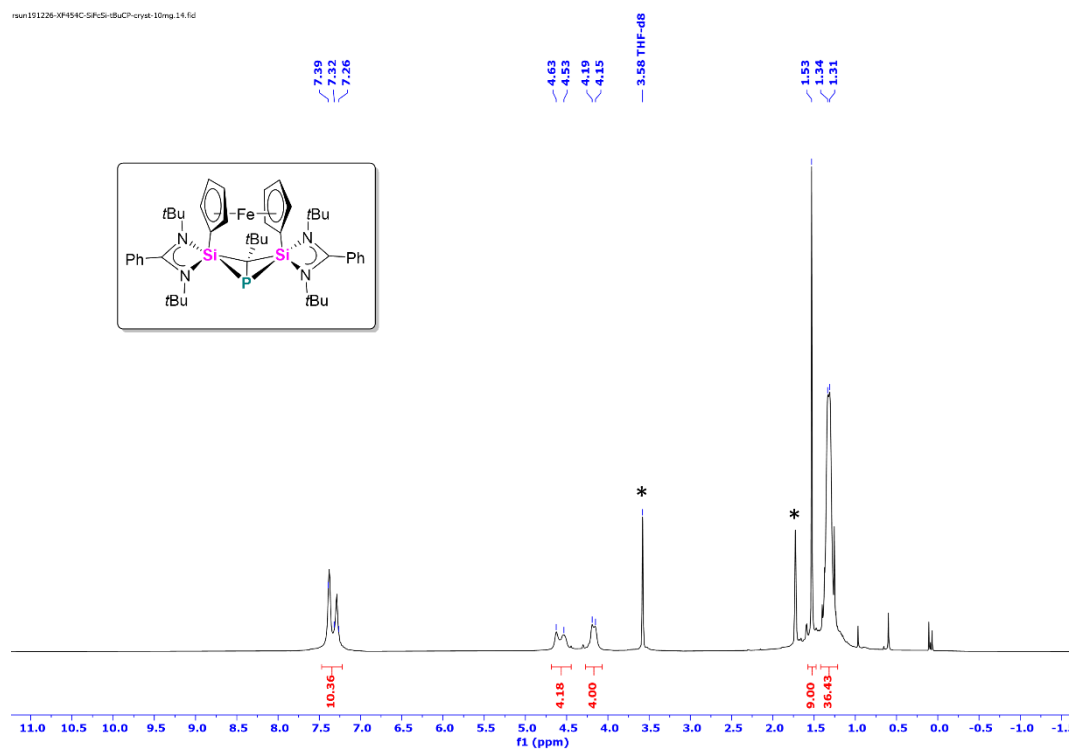

sun4315\_10.fid  
42 Xiaofei Sun\_XF\_454C\_SiFeSi\_tBuCP\_ThF-d8\_13C(1H)

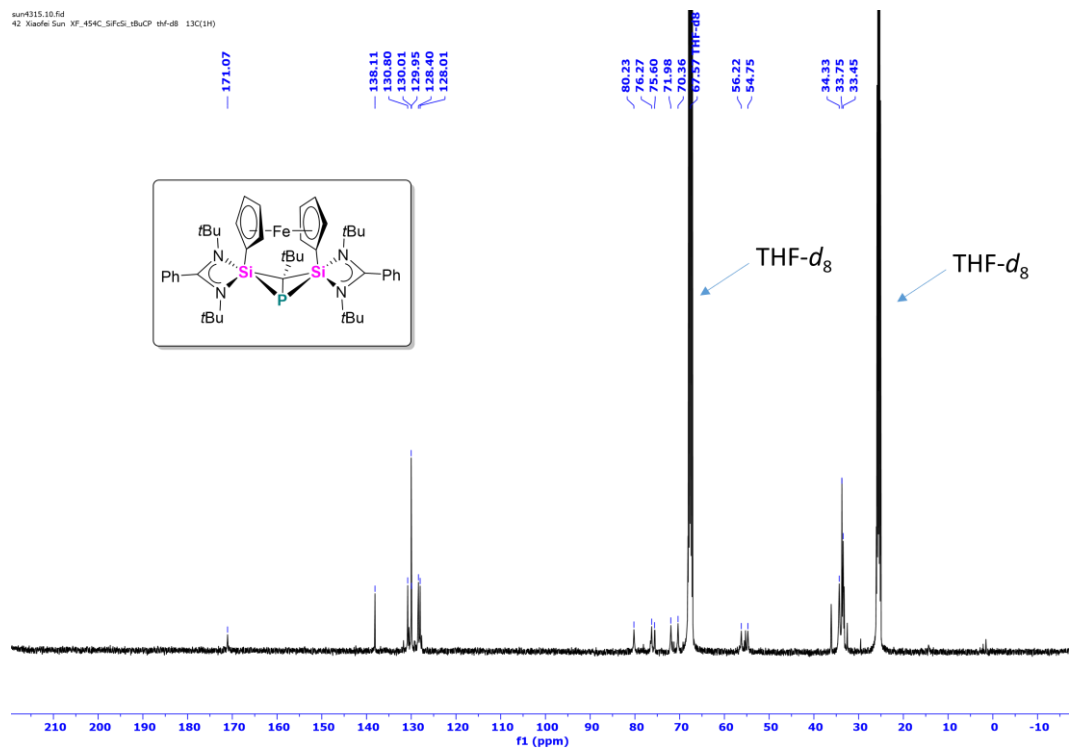

-76.09  
-76.65

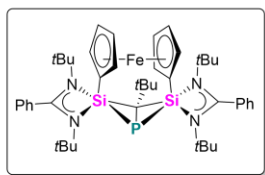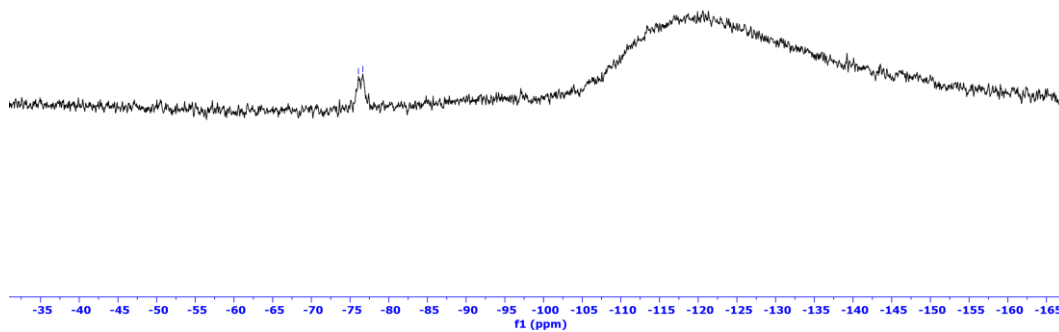

**Figure S3.**  $^{29}\text{Si}\{^1\text{H}\}$  NMR spectrum of **1** in  $\text{THF-}d_8$ .

-294.19

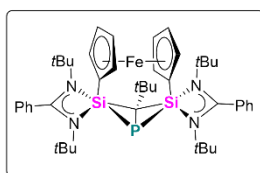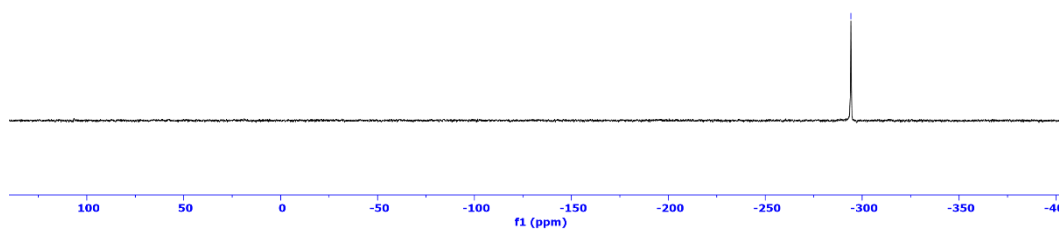

**Figure S4.**  $^{31}\text{P}\{^1\text{H}\}$  NMR spectrum of **1** in  $\text{THF-}d_8$ .

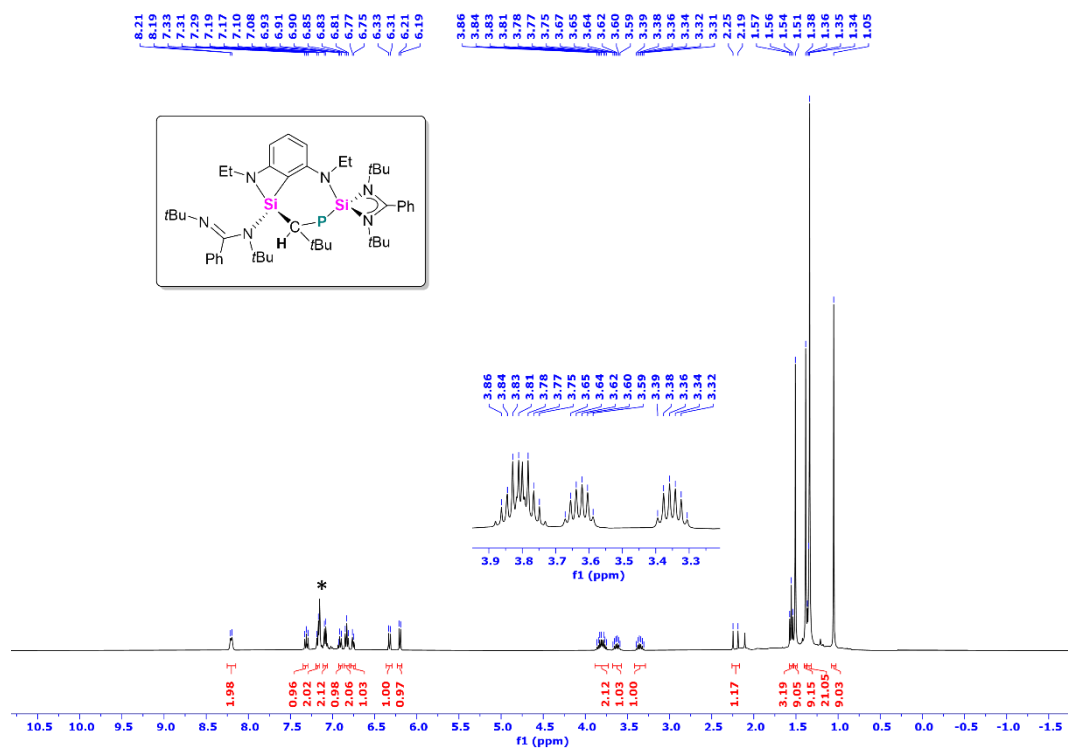

Figure S5.  $^1\text{H}$  NMR spectrum of **2** in  $\text{C}_6\text{D}_6$ . \*, residual protio solvent signal.

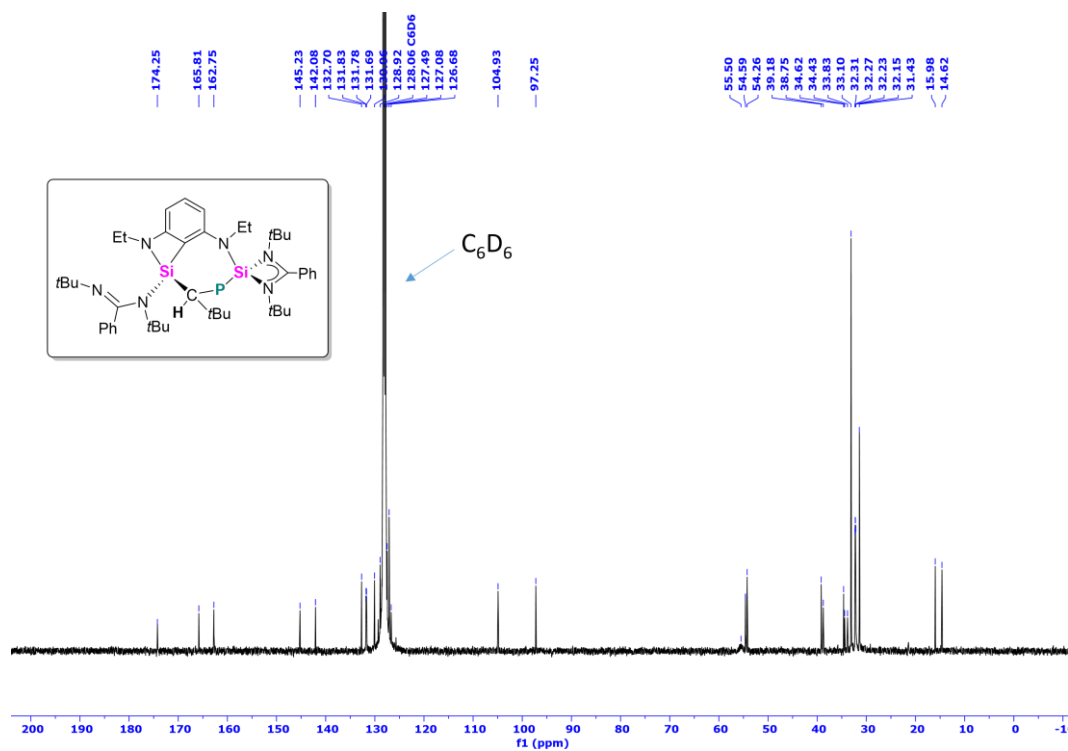

Figure S6.  $^{13}\text{C}\{^1\text{H}\}$  NMR spectrum of **2** in  $\text{C}_6\text{D}_6$ .

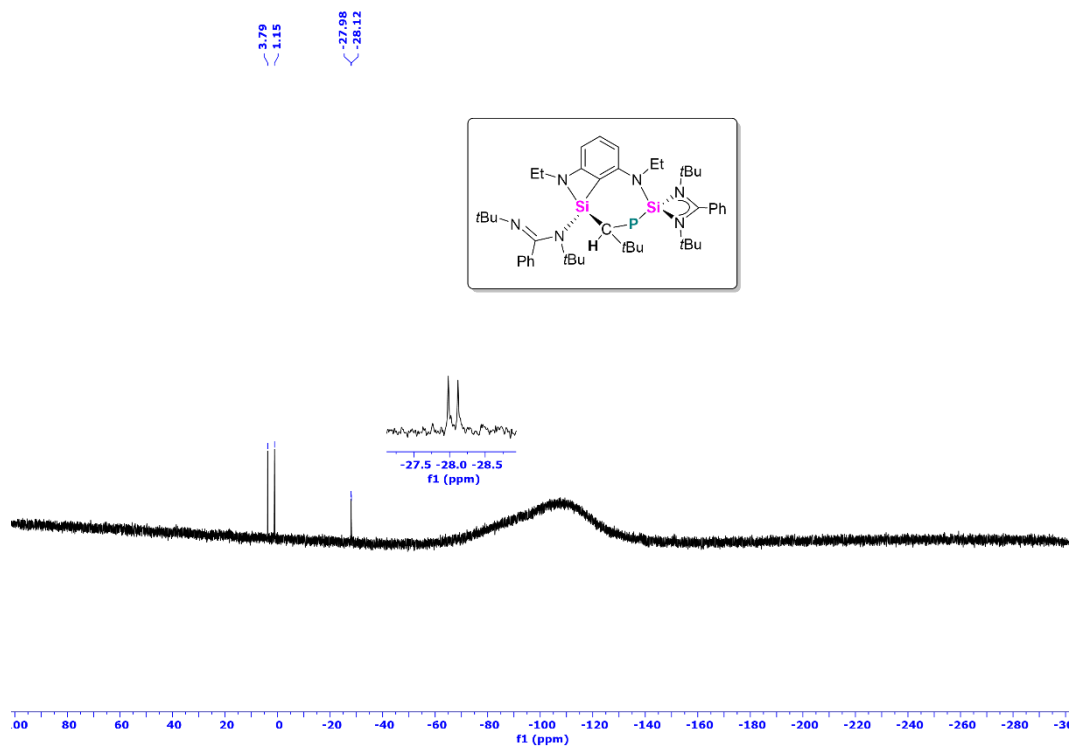

Figure S7.  $^{29}\text{Si}\{^1\text{H}\}$  NMR spectrum of **2** in  $\text{C}_6\text{D}_6$ .

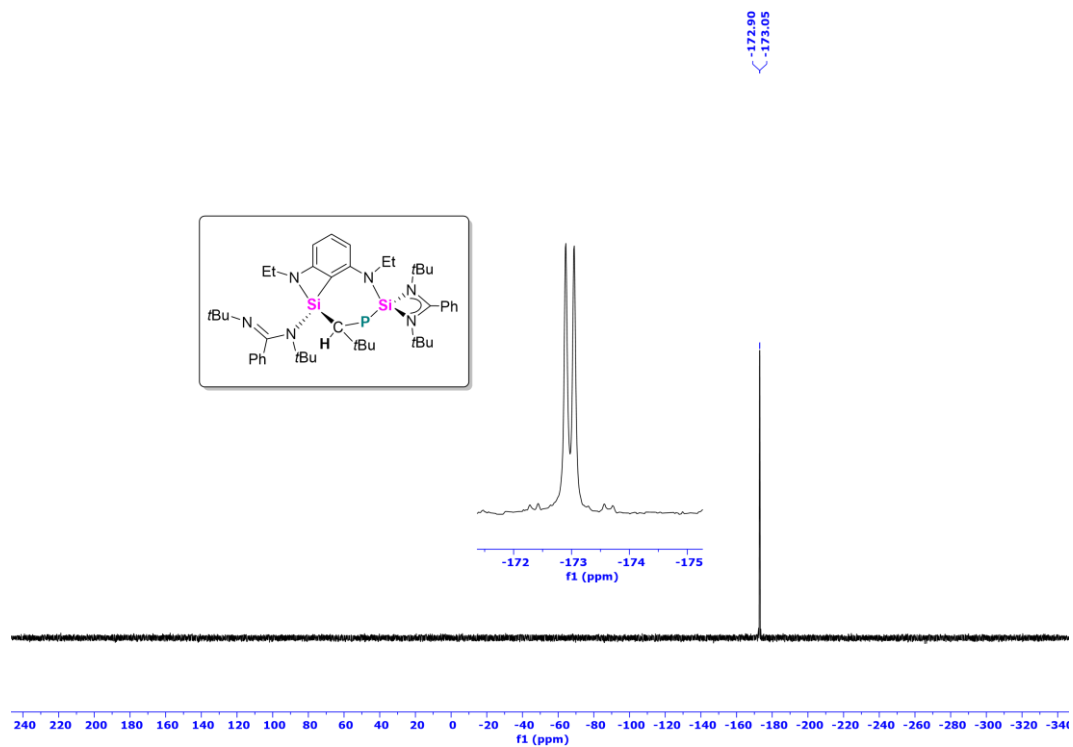

Figure S8.  $^{31}\text{P}$  NMR spectrum of **2** in  $\text{C}_6\text{D}_6$ .

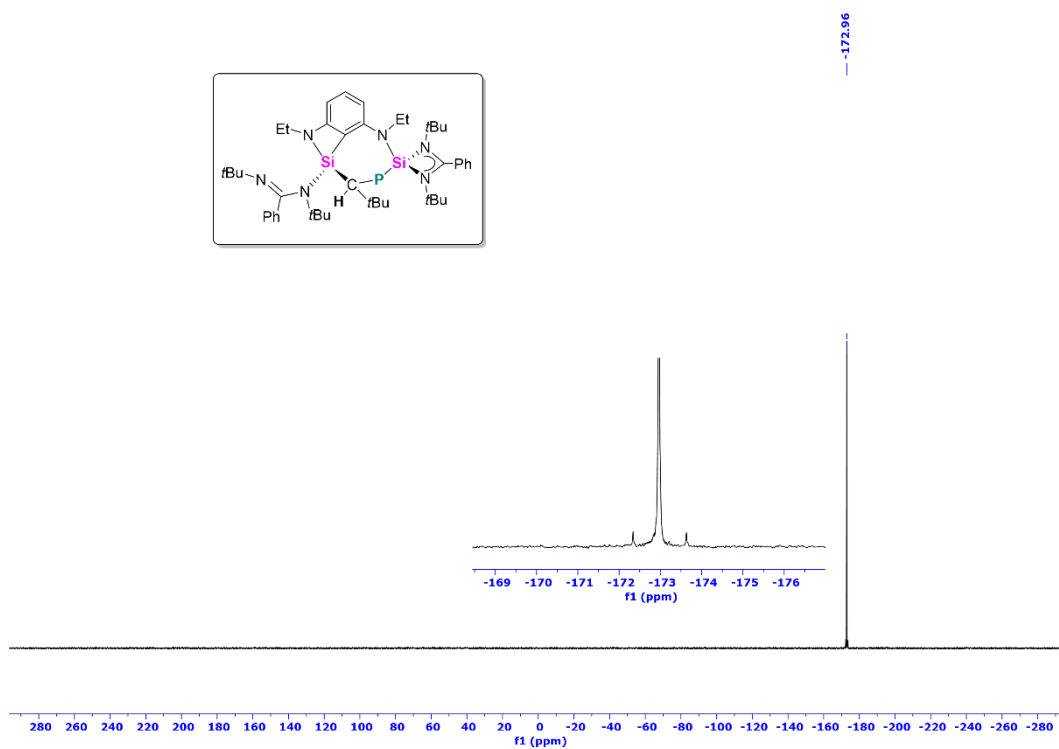

Figure S9.  $^{31}\text{P}\{^1\text{H}\}$  NMR spectrum of **2** in  $\text{C}_6\text{D}_6$ .

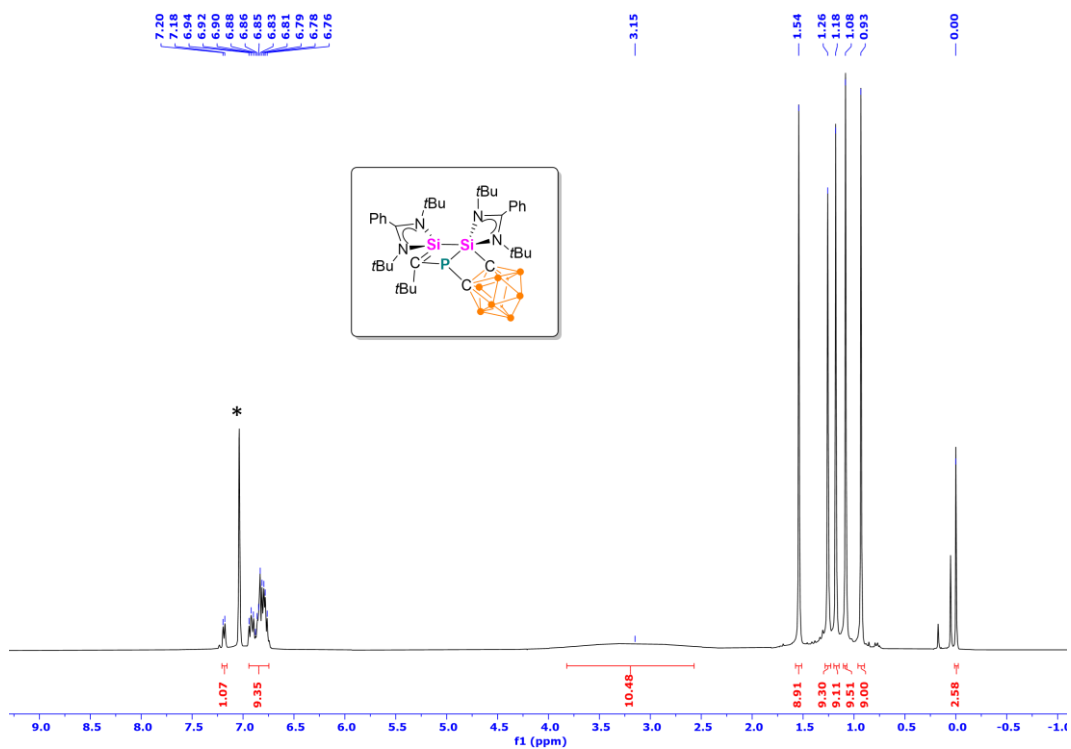

Figure S10.  $^1\text{H}$  NMR spectrum of **3** in  $\text{C}_6\text{D}_6$ . \*, residual protio solvent signal.

run0729\_20.fid  
04 Xiaofei Sun SBiSiBuCP-cryst 11B(1H)

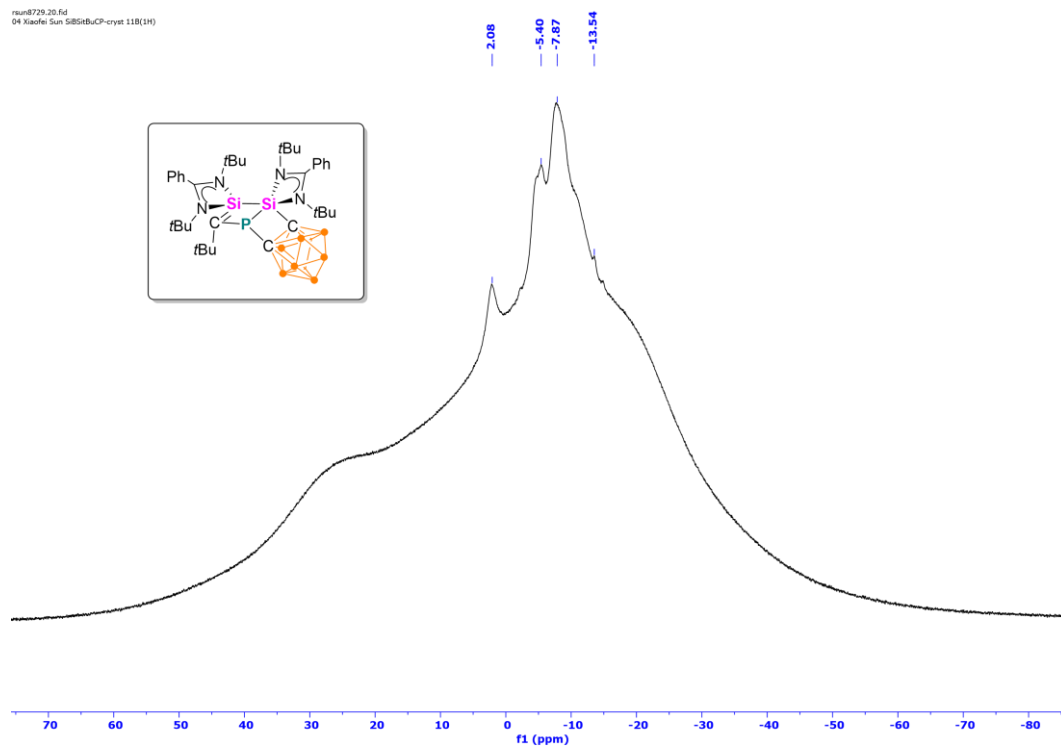

Figure S11.  $^{11}\text{B}\{^1\text{H}\}$  NMR spectrum of **3** in  $\text{C}_6\text{D}_6$ .

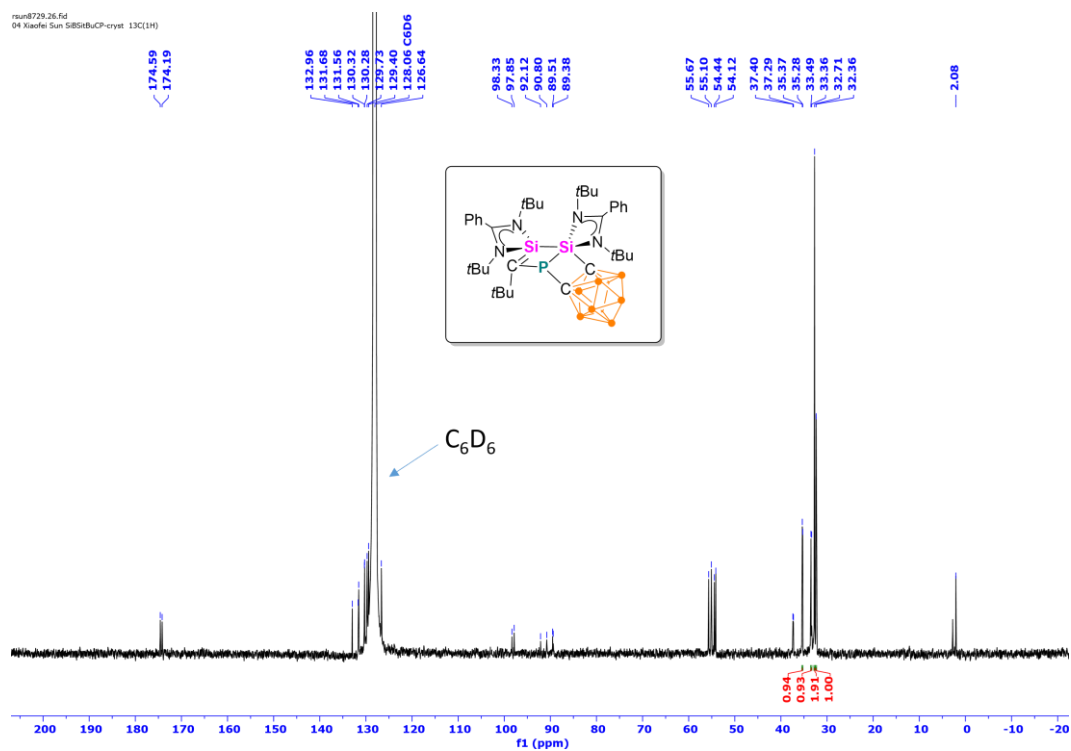

Figure S12.  $^{13}\text{C}\{^1\text{H}\}$  NMR spectrum of **3** in  $\text{C}_6\text{D}_6$ .

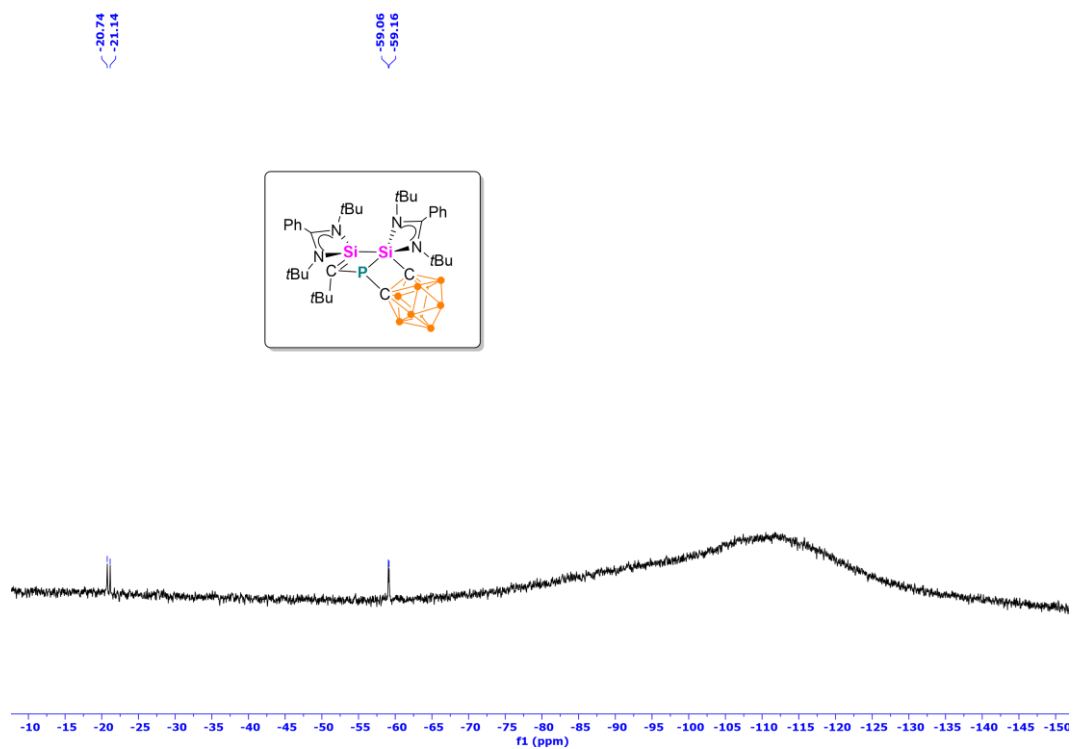

**Figure S13.**  $^{29}\text{Si}\{^1\text{H}\}$  NMR spectrum of **3** in  $\text{C}_6\text{D}_6$ .

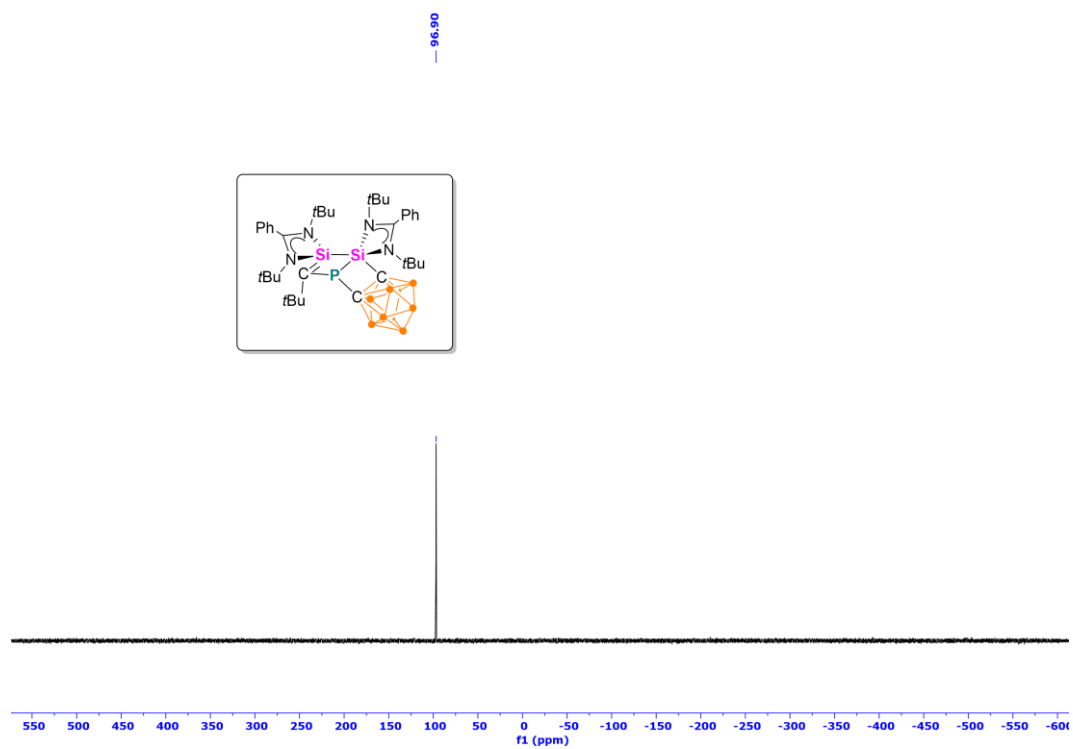

**Figure S14.**  $^{31}\text{P}\{^1\text{H}\}$  NMR spectrum of **3** in  $\text{C}_6\text{D}_6$ .



## II. IR spectra

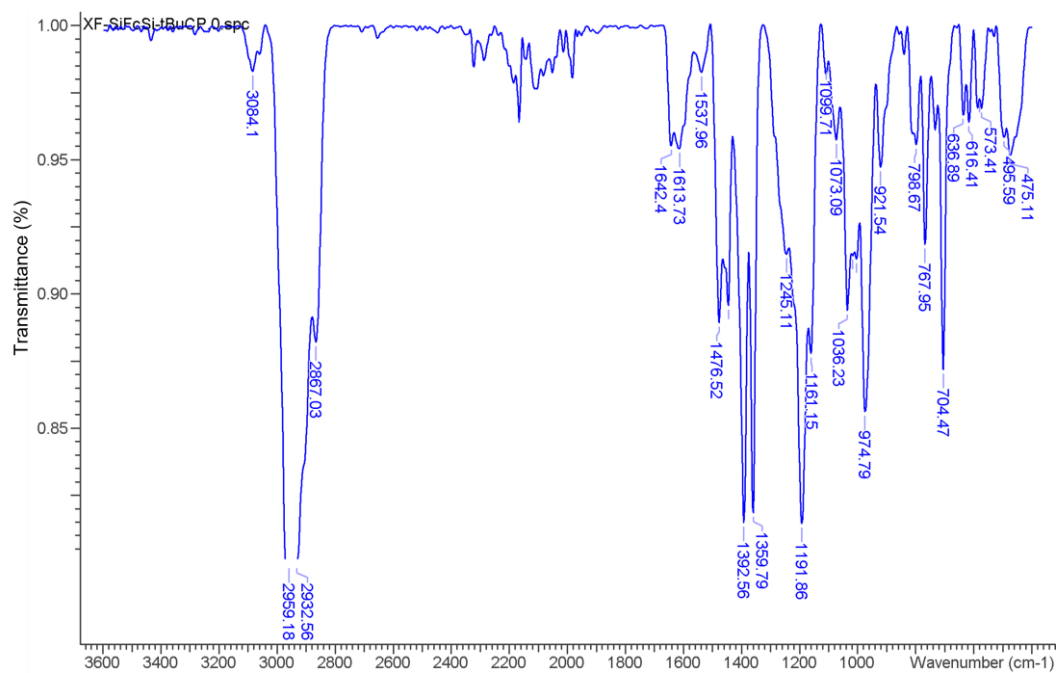

Figure S15. IR spectrum of compound 1.

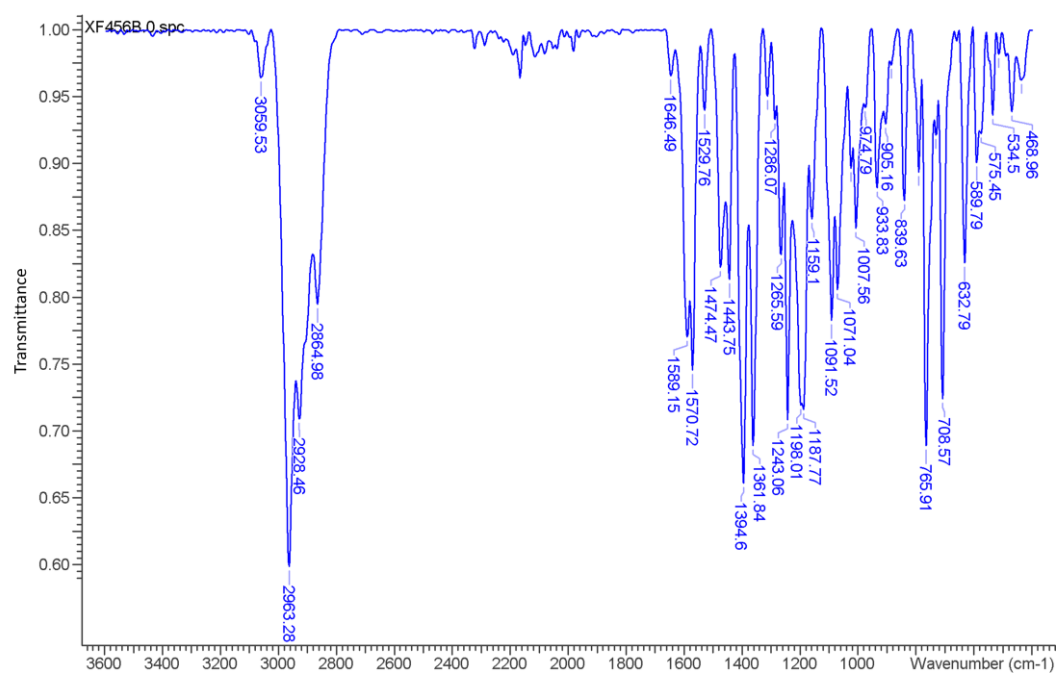

Figure S16. IR spectrum of compound 2.

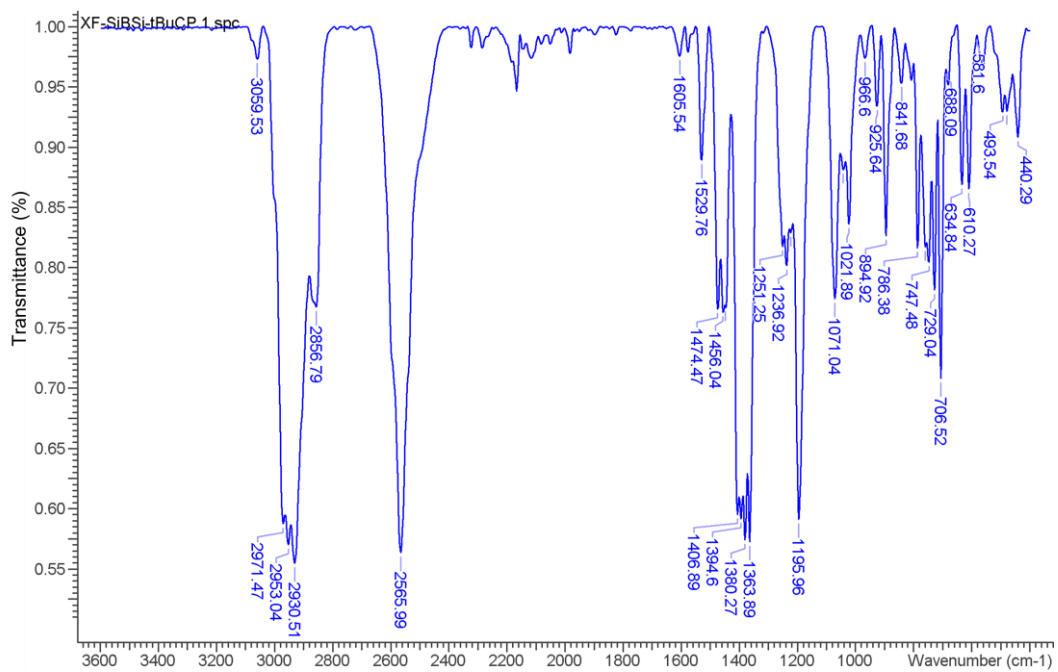

Figure S17. IR spectrum of compound 3.

### III. X-ray crystallography

#### III.1 General methods

Suitable crystals for the X-ray analysis of all compounds were obtained as described above. A suitable crystal was covered in mineral oil (Aldrich) and mounted on a glass fibre. The crystal was transferred directly to the cold stream of a STOE StadiVari (100 K or 110 K) diffractometer. All structures were solved by using the program SHELXS/T<sup>[1,2]</sup> and Olex2.<sup>[3]</sup> The remaining non-hydrogen atoms were located from successive difference Fourier map calculations. The refinements were carried out by using full-matrix least-squares techniques on  $F_o^2$  by using the program SHELXL.<sup>[1,2]</sup> The H-atoms were introduced into the geometrically calculated positions (SHELXL procedures) unless otherwise stated and refined riding on the corresponding parent atoms. In each case, the locations of the largest peaks in the final difference Fourier map calculations, as well as the magnitude of the residual electron densities, were of no chemical significance. Specific comments for each data set are given below. Summary of the crystal data, data collection and refinement for compounds are given in Table S1.

Crystallographic data for the structures reported in this paper have been deposited with the Cambridge Crystallographic Data Centre as a supplementary publication no. CCDC 2345640-2345642. Copies of the data can be obtained free of charge on application to CCDC, 12 Union Road, Cambridge CB21EZ, UK (fax: +(44)1223-336-033; email: [deposit@ccdc.cam.ac.uk](mailto:deposit@ccdc.cam.ac.uk)).

### III.2 Summary of crystal data

**Table S1.** Crystal data, data collection and refinement for compounds **1-3**.

| Compound                     | 1                                                                                                     | 2                                                               | 3                                                                                                                          |
|------------------------------|-------------------------------------------------------------------------------------------------------|-----------------------------------------------------------------|----------------------------------------------------------------------------------------------------------------------------|
| Chemical formula             | C <sub>51</sub> H <sub>57</sub> FeN <sub>4</sub> PSi <sub>2</sub><br>(C <sub>6</sub> D <sub>6</sub> ) | C <sub>45</sub> H <sub>69</sub> N <sub>6</sub> PSi <sub>2</sub> | C <sub>40</sub> H <sub>71</sub> B <sub>10</sub> N <sub>4</sub> P<br>0.5·(C <sub>6</sub> H <sub>18</sub> OSi <sub>2</sub> ) |
| CCDC Number                  | 2345640                                                                                               | 2345641                                                         | 2345642                                                                                                                    |
| $D_{calc.}/g\text{ cm}^{-3}$ | 1.279                                                                                                 | 1.141                                                           | 1.158                                                                                                                      |
| $m/\text{mm}^{-1}$           | 0.454                                                                                                 | 0.150                                                           | 0.166                                                                                                                      |
| Formula Weight               | 887.13                                                                                                | 781.21                                                          | 842.37                                                                                                                     |
| T/K                          | 100                                                                                                   | 100                                                             | 100                                                                                                                        |
| Crystal System               | orthorhombic                                                                                          | triclinic                                                       | monoclinic                                                                                                                 |
| Space Group                  | <i>Pbca</i>                                                                                           | <i>P</i> $\bar{1}$                                              | <i>P2</i> <sub>1</sub> / <i>n</i>                                                                                          |
| $a/\text{Å}$                 | 9.2620(4)                                                                                             | 10.5917(5)                                                      | 11.501(2)                                                                                                                  |
| $b/\text{Å}$                 | 17.7607(6)                                                                                            | 12.9028(6)                                                      | 19.956(3)                                                                                                                  |
| $c/\text{Å}$                 | 56.0109(19)                                                                                           | 18.5962(9)                                                      | 21.117(3)                                                                                                                  |
| $a/^\circ$                   | 90                                                                                                    | 78.204(4)                                                       | 90                                                                                                                         |
| $b/^\circ$                   | 90                                                                                                    | 74.953(4)                                                       | 94.297(11)                                                                                                                 |
| $g/^\circ$                   | 90                                                                                                    | 69.055(4)                                                       | 90                                                                                                                         |
| $V/\text{Å}^3$               | 9213.8(6)                                                                                             | 2274.5(2)                                                       | 4832.8(12)                                                                                                                 |
| Z                            | 8                                                                                                     | 2                                                               | 4                                                                                                                          |
| Z'                           | 1                                                                                                     | 1                                                               | 1                                                                                                                          |
| Wavelength/Å                 | 0.71073                                                                                               | 0.71073                                                         | 0.71073                                                                                                                    |
| Radiation type               | MoK $\alpha$                                                                                          | MoK $\alpha$                                                    | MoK $\alpha$                                                                                                               |
| $Q_{min}/^\circ$             | 2.316                                                                                                 | 3.015                                                           | 1.934                                                                                                                      |
| $Q_{max}/^\circ$             | 26.000                                                                                                | 25.499                                                          | 25.250                                                                                                                     |
| Measured Refl's.             | 25451                                                                                                 | 28140                                                           | 23166                                                                                                                      |
| Indep't Refl's               | 8869                                                                                                  | 8474                                                            | 8735                                                                                                                       |
| Refl's $I \geq 2\sigma(I)$   | 6433                                                                                                  | 7312                                                            | 5069                                                                                                                       |
| $R_{int}$                    | 0.0360                                                                                                | 0.0730                                                          | 0.0817                                                                                                                     |
| Parameters                   | 535                                                                                                   | 544                                                             | 583                                                                                                                        |
| Restraints                   | 0                                                                                                     | 106                                                             | 58                                                                                                                         |
| Largest Peak                 | 0.348                                                                                                 | 0.925                                                           | 0.589                                                                                                                      |
| Deepest Hole                 | -0.421                                                                                                | -0.829                                                          | -0.936                                                                                                                     |
| Goof                         | 1.024                                                                                                 | 1.043                                                           | 1.012                                                                                                                      |
| $wR_2$ (all data)            | 0.1003                                                                                                | 0.1957                                                          | 0.2178                                                                                                                     |
| $wR_2$                       | 0.0889                                                                                                | 0.1848                                                          | 0.1776                                                                                                                     |
| $R_1$ (all data)             | 0.0667                                                                                                | 0.0771                                                          | 0.1517                                                                                                                     |
| $R_1$                        | 0.0399                                                                                                | 0.0705                                                          | 0.0803                                                                                                                     |

### III.3 Crystal structures

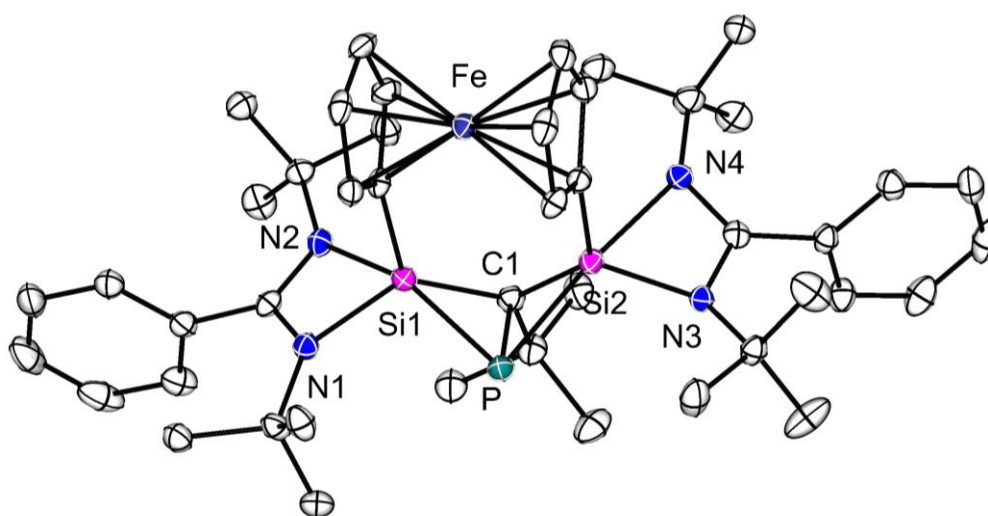

**Figure S18.** Molecular structure of the compound **1** in the solid state with thermal ellipsoids at 50% level. Hydrogen atoms and non-coordinating solvent molecules are omitted for clarity. Selected bond distances [Å] and angles [°]: P–C1 2.056(2), P–Si1 2.2716(9), P–Si2 2.2310(9), Si1–C1 1.867(2), Si2–C1 1.875(2), Si1–N1 1.858(2), Si1–N2 2.080(2), Si2–N3 1.817(2), Si2–N4 2.221(2); N1–Si1–N2 66.49(8), N3–Si2–N4 65.22(8), Si1–C1–Si2 105.07(11), Si1–P–Si2 82.54(3), Si1–C1–P 70.58(8), Si2–C1–P 68.97(8), Si1–P–C1 50.81(7), Si2–P–C1 51.68(7).

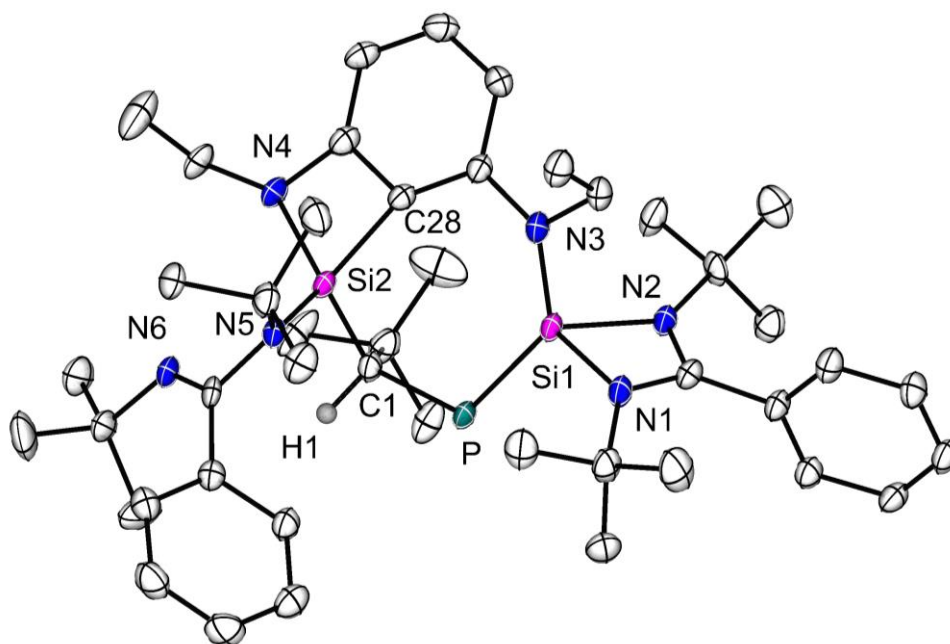

**Figure S19.** Molecular structure of the compound **2** in the solid state with thermal ellipsoids at 50% level. Hydrogen atoms are omitted for clarity. Selected bond distances [Å] and angles [°]: Si1–P 2.1322(8), Si1–N1 1.835(2), Si1–N2 1.889(2), Si1–N3 1.728(2), P–C1 1.897(2), Si2–C1 1.881(2), Si2–C28 1.855(2), Si2–N4 1.777(2), Si2–N5 1.748(2); N1–Si1–N2 70.42(8), Si1–P–C1 116.28(7), P–C1–Si2 106.15(10), N4–Si2–C28 75.40(9).

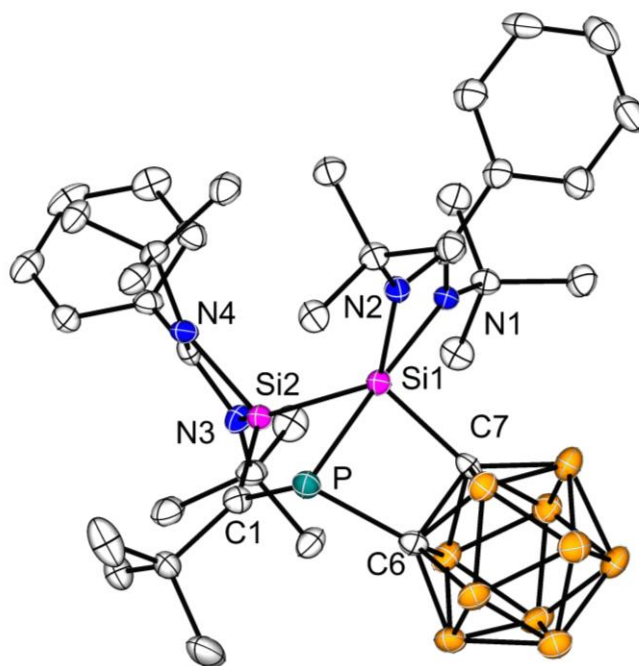

**Figure S20.** Molecular structure of the compound **3** in the solid state with thermal ellipsoids at 50% level. Hydrogen atoms and non-coordinating solvent molecules are omitted for clarity. Selected bond distances [Å] and angles [°]: Si1–Si2 2.352(2), Si2–C1 1.761(5), C1–P 1.780(5), P–Si1 2.343(2), P–C6 1.964(5), Si1–C7 1.969(5), Si1–N1 1.956(4), Si1–N2 1.857(4), Si2–N3 1.894(4), Si2–N4 1.884(4); N1–Si1–N2 68.7(2), N3–Si2–N4 69.2(2), Si1–P–C1 89.5(2), Si1–P–C6 79.93(14), Si1–Si2–C1 89.7(2), Si2–Si1–P 73.84(6), Si2–Si1–C7 118.53(14), Si2–C1–P 105.6(3), C1–P–C6 110.9(2), C7–Si1–P 80.64(14).

#### IV. Quantum chemical calculations

All computations were performed using Gaussian16<sup>[4]</sup> utilizing the PBE0 level of theory, Def2SVP basis sets and empirical dispersion correction (GD3BJ). No solvent corrections were applied. All optimized molecular structures were checked to be minima on the energy hypersurface and possess no imaginary vibrational frequencies. The transition states possess exactly one imaginary frequency.

##### IV.1 Reaction pathway

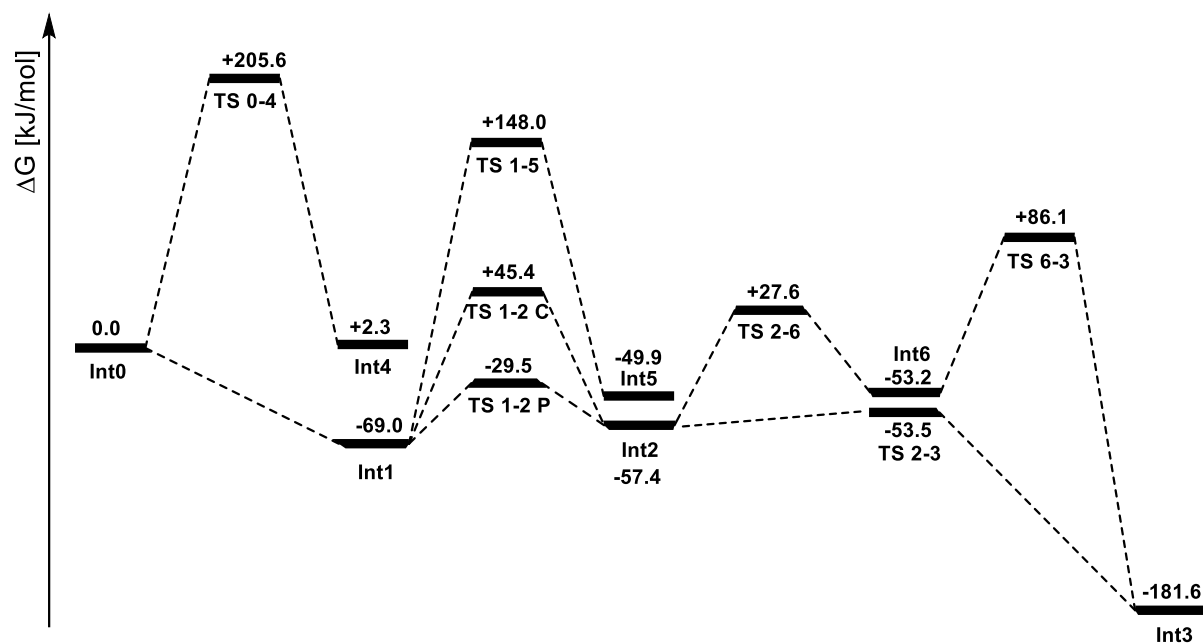

Figure S21. Computed reaction pathway for the reaction of [LSiSiL] and  $t\text{BuC}\equiv\text{P}$ .

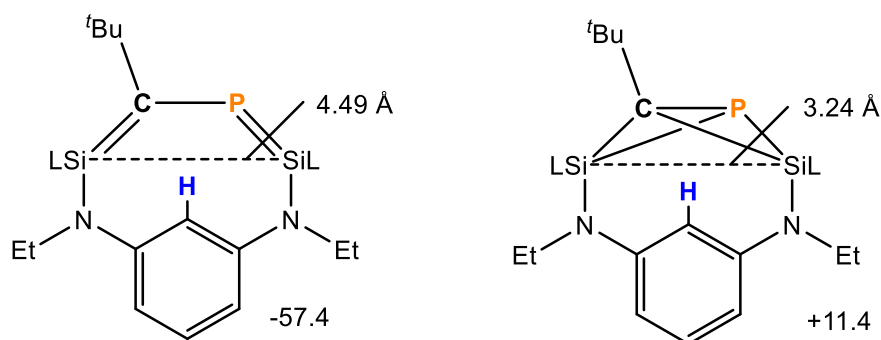

Figure S22. Computed isomers of Int2.



## IV.2 Optimised Structures

IV.2 Int0

0 1

|    |             |             |             |
|----|-------------|-------------|-------------|
| Si | -2.57600600 | 0.58375400  | 0.66372900  |
| N  | -3.39591000 | -0.81868200 | -0.38091900 |
| N  | -4.47786400 | 0.49729200  | 0.91162600  |
| N  | -2.47052700 | 1.90103800  | -0.54033400 |
| Si | 2.35138600  | 0.29640400  | 0.32479000  |
| C  | -2.86068600 | -1.93167000 | -1.15855900 |
| C  | -4.56248500 | -0.64842200 | 0.23524700  |
| C  | -5.39209800 | 1.15962800  | 1.83592900  |
| C  | -3.54559300 | 2.26509900  | -1.44358200 |
| C  | -1.28789800 | 2.65592200  | -0.60625400 |
| N  | 2.36682600  | 1.96406400  | -0.34701600 |
| N  | 3.69016700  | -0.54581100 | -0.76656000 |
| C  | -0.05733900 | 2.00098300  | -0.49732800 |
| C  | -1.44417700 | -1.52042700 | -1.56819500 |
| C  | -3.70129700 | -2.16393700 | -2.41667100 |
| C  | -2.78337500 | -3.21441100 | -0.32425400 |
| C  | -5.70950000 | -1.59521200 | 0.24676600  |
| C  | -4.81074100 | 2.55551700  | 2.07164100  |
| C  | -6.79312500 | 1.29623100  | 1.23604300  |
| C  | -5.45628200 | 0.40855100  | 3.17023900  |
| C  | -3.17859600 | 2.11883700  | -2.91221700 |
| C  | -1.29244400 | 4.05096500  | -0.79127800 |
| C  | 1.17344200  | 2.68176600  | -0.48898000 |
| C  | 3.60323000  | 2.62906000  | -0.71137900 |
| C  | 3.58625400  | -1.38796100 | -1.95643600 |
| C  | 4.55563500  | -0.55800400 | 0.24763300  |
| C  | -5.82905300 | -2.55762200 | 1.25484600  |
| C  | -6.68549200 | -1.52237900 | -0.75279800 |
| C  | -0.08189900 | 4.73206500  | -0.81920300 |

|   |             |             |             |
|---|-------------|-------------|-------------|
| C | 1.13976800  | 4.07891100  | -0.66051000 |
| C | 3.76963700  | 2.86469600  | -2.20564800 |
| C | 2.36142300  | -0.88394500 | -2.72281900 |
| C | 3.36584100  | -2.85561200 | -1.57501400 |
| C | 4.82742100  | -1.24726700 | -2.84019400 |
| N | 4.05463600  | 0.24311700  | 1.18651800  |
| C | 5.79126500  | -1.37696500 | 0.35598000  |
| C | -6.91250400 | -3.43346600 | 1.26290700  |
| C | -7.76816800 | -2.39830200 | -0.74209400 |
| C | 4.51829900  | 0.61392700  | 2.51979800  |
| C | 6.98956600  | -0.90798500 | -0.19302300 |
| C | 5.77229800  | -2.61192400 | 1.01256200  |
| C | -7.88387600 | -3.35478600 | 0.26587900  |
| C | 3.63718700  | 1.78567000  | 2.95833300  |
| C | 5.98012900  | 1.06423900  | 2.49493000  |
| C | 4.33550300  | -0.54939100 | 3.50013600  |
| C | 8.15437400  | -1.66310500 | -0.08298600 |
| C | 6.93841200  | -3.36705000 | 1.11827100  |
| C | 8.13077300  | -2.89363600 | 0.57267300  |
| H | -2.23184700 | 4.59485400  | -0.89811700 |
| H | -0.08353700 | 5.81693400  | -0.95828700 |
| H | 2.05862500  | 4.66389200  | -0.68062100 |
| H | 3.69845900  | 3.58775700  | -0.16703500 |
| H | 4.43559000  | 2.00923500  | -0.34878000 |
| H | 3.79586600  | 1.90526400  | -2.74247700 |
| H | 2.94125600  | 3.45992800  | -2.61720400 |
| H | 4.71032300  | 3.39887400  | -2.41413100 |
| H | 1.45530200  | -0.96640400 | -2.10258500 |
| H | 2.47835600  | 0.17140300  | -3.00582600 |
| H | 2.20827900  | -1.47839000 | -3.63536000 |
| H | 3.17898900  | -3.46286100 | -2.47421600 |
| H | 4.24451600  | -3.27399700 | -1.06377700 |

|   |             |             |             |
|---|-------------|-------------|-------------|
| H | 2.49468700  | -2.94530300 | -0.90815300 |
| H | 5.01944800  | -0.18826300 | -3.06899700 |
| H | 5.72066000  | -1.66750400 | -2.35824100 |
| H | 4.67480600  | -1.78231100 | -3.78974400 |
| H | 3.75514600  | 2.64143200  | 2.27816500  |
| H | 2.57453900  | 1.49603500  | 2.95709500  |
| H | 3.90393300  | 2.10621000  | 3.97597500  |
| H | 6.26471800  | 1.45829200  | 3.48221400  |
| H | 6.66151300  | 0.23663700  | 2.25501400  |
| H | 6.12622100  | 1.86366600  | 1.75258400  |
| H | 3.29305300  | -0.90088500 | 3.47911900  |
| H | 4.99569800  | -1.39079100 | 3.24595700  |
| H | 4.57537700  | -0.23048200 | 4.52622600  |
| H | 7.00383500  | 0.05780300  | -0.70316700 |
| H | 9.08645900  | -1.28781200 | -0.51151500 |
| H | 9.04479100  | -3.48580100 | 0.65827100  |
| H | 6.91470000  | -4.33165300 | 1.63049800  |
| H | 4.83654100  | -2.98222900 | 1.43700100  |
| H | -0.98115300 | -2.30526700 | -2.18431300 |
| H | -1.45857600 | -0.58444800 | -2.14547400 |
| H | -0.81037100 | -1.36313500 | -0.68030800 |
| H | -4.71100700 | -2.51958400 | -2.16862000 |
| H | -3.79110000 | -1.23212600 | -2.99498400 |
| H | -3.22514200 | -2.92302000 | -3.05592300 |
| H | -2.22123900 | -3.02802600 | 0.60337200  |
| H | -3.78361400 | -3.58653700 | -0.06152500 |
| H | -2.26705600 | -4.00673100 | -0.88809800 |
| H | -4.76740700 | 3.12467600  | 1.13195100  |
| H | -5.42807300 | 3.11220200  | 2.79187000  |
| H | -3.78783100 | 2.48790600  | 2.47394000  |
| H | -7.28974800 | 0.32307800  | 1.12288200  |
| H | -7.41993200 | 1.91869600  | 1.89246700  |

|   |             |             |             |
|---|-------------|-------------|-------------|
| H | -6.74479900 | 1.78049700  | 0.24879300  |
| H | -4.44331800 | 0.27856300  | 3.57982500  |
| H | -6.05926000 | 0.96913300  | 3.90139500  |
| H | -5.91439700 | -0.58304600 | 3.04583300  |
| H | -5.06395700 | -2.62138000 | 2.03174500  |
| H | -6.99748300 | -4.18287600 | 2.05324600  |
| H | -8.73351100 | -4.04145400 | 0.27414400  |
| H | -8.52686000 | -2.33236800 | -1.52526900 |
| H | -6.59414100 | -0.76784300 | -1.53739200 |
| H | -4.40708200 | 1.62196700  | -1.21093900 |
| H | -3.89247800 | 3.29927800  | -1.25178100 |
| H | -2.90196900 | 1.07756000  | -3.13759600 |
| H | -4.02464000 | 2.39936000  | -3.55961100 |
| H | -2.32236100 | 2.75879400  | -3.17378800 |
| H | -0.05739900 | 0.91170500  | -0.43053600 |

#### IV.2 Int0 - PC<sup>f</sup>Bu

O 1

|   |             |             |             |
|---|-------------|-------------|-------------|
| P | -2.28775700 | 0.00042600  | -0.00035800 |
| C | -0.73935000 | 0.00109800  | -0.00158800 |
| C | 0.72873600  | 0.00013400  | 0.00001100  |
| C | 1.22762400  | -1.18966400 | 0.83584300  |
| H | 2.32904800  | -1.20320000 | 0.84727800  |
| H | 0.86998700  | -1.11831000 | 1.87330600  |
| H | 0.87240000  | -2.14159200 | 0.41506600  |
| C | 1.23074000  | 1.31767000  | 0.61251000  |
| H | 0.87585300  | 1.43033700  | 1.64728900  |
| H | 2.33219200  | 1.33126900  | 0.61832300  |
| H | 0.87535300  | 2.18165200  | 0.03226000  |
| C | 1.23150800  | -0.12941200 | -1.44677900 |
| H | 0.87556000  | -1.06401200 | -1.90419600 |
| H | 0.87743500  | 0.71046600  | -2.06212000 |

H 2.33298600 -0.13195500 -1.46181000

IV.2 Int1  
0 1

Si 2.37270200 0.09309900 -0.11781800

N 3.82443600 1.15297500 -0.65883500

N 4.15820100 -0.54038200 0.63665400

N 2.14632500 -1.22353000 -1.27855300

Si -2.77513100 -0.37144100 0.10906300

C 3.89897500 2.44497700 -1.35989800

C 4.73819900 0.49256700 0.07715000

C 4.74932700 -1.68716200 1.33094700

C 3.21072500 -1.56332200 -2.20520700

C 1.04994200 -2.10445900 -1.21882800

N -2.64327500 -1.86461400 -0.87150400

N -4.05911100 0.63956000 -0.88315500

C -0.25541000 -1.60904500 -1.14308600

C 2.93169300 2.36833300 -2.54532500

C 5.28769500 2.74464900 -1.93028300

C 3.49713300 3.57417900 -0.40520500

C 6.15285400 0.90776900 0.25764300

C 3.59834900 -2.63672000 1.65992400

C 5.74299800 -2.43220600 0.43155700

C 5.45403500 -1.26707900 2.62521700

C 2.74567800 -1.57701800 -3.65271600

C 1.22555000 -3.49997500 -1.27218400

C -1.37841700 -2.44406600 -1.02823000

C -3.78991000 -2.56307000 -1.41913000

C -3.92304500 1.66396700 -1.91530900

C -4.99566100 0.42378600 0.03913800

C 6.47208700 1.75588900 1.32302500

C 7.16030600 0.48165300 -0.61239400

|   |             |             |             |
|---|-------------|-------------|-------------|
| C | 0.11443600  | -4.33690400 | -1.22332700 |
| C | -1.17696300 | -3.83452800 | -1.08872700 |
| C | -3.76296600 | -2.68055400 | -2.93519000 |
| C | -2.60634700 | 1.36311300  | -2.63473900 |
| C | -3.83961100 | 3.06470000  | -1.30071100 |
| C | -5.08015000 | 1.57889100  | -2.91251900 |
| N | -4.53754500 | -0.55174200 | 0.82521600  |
| C | -6.25594300 | 1.18928600  | 0.22628100  |
| C | 7.78583800  | 2.17869700  | 1.51047400  |
| C | 8.47300200  | 0.90325500  | -0.41993100 |
| C | -5.03583900 | -1.12883500 | 2.06918300  |
| C | -7.41860100 | 0.79644000  | -0.44499700 |
| C | -6.29457400 | 2.29776400  | 1.07869400  |
| C | 8.78817800  | 1.75380000  | 0.63940500  |
| C | -4.18572700 | -2.37687200 | 2.31862000  |
| C | -6.50521300 | -1.53586500 | 1.94869200  |
| C | -4.84529800 | -0.15017100 | 3.23315600  |
| C | -8.60577400 | 1.50129300  | -0.26280400 |
| C | -7.48334900 | 3.00161500  | 1.25847900  |
| C | -8.64032000 | 2.60426100  | 0.58965700  |
| H | 2.22364600  | -3.93063700 | -1.36371400 |
| H | 0.26116600  | -5.41947000 | -1.27270000 |
| H | -2.02144900 | -4.52168700 | -1.02591100 |
| H | -3.89224700 | -3.56968900 | -0.96893700 |
| H | -4.69070000 | -2.01419200 | -1.10731600 |
| H | -3.75007700 | -1.68185400 | -3.39742600 |
| H | -2.86896400 | -3.22224300 | -3.27914400 |
| H | -4.65040900 | -3.21924700 | -3.30335700 |
| H | -1.75752900 | 1.45399200  | -1.93785800 |
| H | -2.60534000 | 0.34337700  | -3.04572100 |
| H | -2.44802600 | 2.07591100  | -3.45710300 |
| H | -3.62488100 | 3.81129900  | -2.08079800 |

|   |             |             |             |
|---|-------------|-------------|-------------|
| H | -4.78301300 | 3.34934900  | -0.81384500 |
| H | -3.02871400 | 3.10070800  | -0.55704600 |
| H | -5.15961000 | 0.56023300  | -3.32155600 |
| H | -6.03869100 | 1.84314300  | -2.44449300 |
| H | -4.91086600 | 2.27455400  | -3.74834100 |
| H | -4.30527000 | -3.10117200 | 1.50004400  |
| H | -3.11846900 | -2.11364500 | 2.38686400  |
| H | -4.47966700 | -2.86036900 | 3.26174400  |
| H | -6.81197800 | -2.09119800 | 2.84788600  |
| H | -7.16724600 | -0.66495400 | 1.85007300  |
| H | -6.65482100 | -2.18825900 | 1.07488700  |
| H | -3.79363600 | 0.16942000  | 3.29092900  |
| H | -5.47629700 | 0.74142600  | 3.10856200  |
| H | -5.11855500 | -0.62609100 | 4.18769400  |
| H | -7.38790200 | -0.07099600 | -1.10821500 |
| H | -9.50974400 | 1.18644600  | -0.78912700 |
| H | -9.57192900 | 3.15667200  | 0.73247100  |
| H | -7.50491800 | 3.86703600  | 1.92481100  |
| H | -5.38553500 | 2.61096300  | 1.59690600  |
| H | 2.90294700  | 3.33537600  | -3.06907700 |
| H | 3.26433900  | 1.59855100  | -3.25792000 |
| H | 1.91652000  | 2.11481700  | -2.21460900 |
| H | 6.03318900  | 2.97254300  | -1.15856700 |
| H | 5.65854800  | 1.90802800  | -2.54043000 |
| H | 5.20701500  | 3.62614900  | -2.58369600 |
| H | 2.48470800  | 3.41403500  | -0.00756800 |
| H | 4.19552400  | 3.62436900  | 0.44443200  |
| H | 3.51804100  | 4.54555800  | -0.92293900 |
| H | 3.04196800  | -2.91162300 | 0.75290400  |
| H | 3.98481200  | -3.55386200 | 2.12771600  |
| H | 2.89024200  | -2.17113100 | 2.35560300  |
| H | 6.63873000  | -1.83081900 | 0.22843700  |

|   |             |             |             |
|---|-------------|-------------|-------------|
| H | 6.07091000  | -3.35881500 | 0.92666500  |
| H | 5.27414600  | -2.70344100 | -0.52485300 |
| H | 4.78419600  | -0.66999400 | 3.25990600  |
| H | 5.75781700  | -2.16045600 | 3.19200800  |
| H | 6.35698400  | -0.67492600 | 2.42304400  |
| H | 5.68362200  | 2.08148300  | 2.00545600  |
| H | 8.02767300  | 2.84286000  | 2.34331100  |
| H | 9.81845600  | 2.08563500  | 0.78673500  |
| H | 9.25511400  | 0.56856000  | -1.10511500 |
| H | 6.91068600  | -0.17135300 | -1.45121000 |
| H | 4.00896600  | -0.81591200 | -2.09154800 |
| H | 3.67471600  | -2.53725200 | -1.95673900 |
| H | 2.34077300  | -0.59331900 | -3.93459400 |
| H | 3.57804300  | -1.82303100 | -4.33080000 |
| H | 1.95044800  | -2.32200500 | -3.80453200 |
| H | -0.40709700 | -0.53328300 | -1.20788100 |
| P | 0.60934100  | 1.50002400  | 0.07719000  |
| C | 1.24003000  | 0.43427900  | 1.25523100  |
| C | 0.76061100  | 0.16238200  | 2.66261600  |
| C | 0.15757000  | -1.25038100 | 2.68455700  |
| H | -0.19591400 | -1.50397300 | 3.69805700  |
| H | -0.69742300 | -1.30087200 | 1.99236300  |
| H | 0.88271900  | -2.01232700 | 2.36777400  |
| C | -0.32419500 | 1.16444000  | 3.06017500  |
| H | -1.17109700 | 1.10870400  | 2.35767400  |
| H | -0.69365800 | 0.94961000  | 4.07622600  |
| H | 0.06360500  | 2.19536700  | 3.04290400  |
| C | 1.93343400  | 0.26707000  | 3.64085200  |
| H | 2.72862800  | -0.44626900 | 3.38840700  |
| H | 2.36977100  | 1.27839300  | 3.61670700  |
| H | 1.60169600  | 0.06143000  | 4.67185200  |



## IV.2 Int2

0 1

|    |             |             |             |
|----|-------------|-------------|-------------|
| Si | 2.38716200  | 0.49798800  | 0.33413400  |
| N  | 4.03996600  | 0.13280800  | 1.10080000  |
| N  | 3.57981300  | -0.13516900 | -0.97890900 |
| N  | 2.37762800  | 2.24418800  | -0.00741200 |
| Si | -2.08509000 | 0.07358400  | 0.41111000  |
| C  | 4.47506000  | -0.08004600 | 2.48781000  |
| C  | 4.50025800  | -0.37488400 | -0.05233800 |
| C  | 3.57759000  | -0.25557800 | -2.43703500 |
| C  | 3.58071000  | 2.96268900  | -0.37145700 |
| C  | 1.13911900  | 2.86979800  | -0.18864800 |
| N  | -2.21406600 | 1.79855000  | 0.82426400  |
| N  | -3.72345800 | -0.56304500 | 1.11656600  |
| C  | 0.06615800  | 2.35818800  | 0.54086400  |
| C  | 3.58644600  | 0.82075300  | 3.34623300  |
| C  | 5.93599500  | 0.33246600  | 2.67208800  |
| C  | 4.26519200  | -1.54199900 | 2.89045800  |
| C  | 5.75591100  | -1.13689300 | -0.24871000 |
| C  | 2.25925700  | 0.37205800  | -2.89760400 |
| C  | 4.75085500  | 0.51941700  | -3.04276900 |
| C  | 3.64121300  | -1.71927100 | -2.88050600 |
| C  | 3.86431500  | 4.14500100  | 0.54179000  |
| C  | 0.87727800  | 3.92021500  | -1.08475200 |
| C  | -1.25140700 | 2.65344800  | 0.24825400  |
| C  | -3.43440300 | 2.42859100  | 1.29578200  |
| C  | -4.14414300 | -1.13227900 | 2.39936200  |
| C  | -4.31838600 | -0.48570800 | -0.07387800 |
| C  | 5.71446800  | -2.53518200 | -0.25910100 |
| C  | 6.97402800  | -0.47664800 | -0.43788200 |
| C  | -0.44367400 | 4.34907200  | -1.25650800 |
| C  | -1.52016900 | 3.71712100  | -0.63439000 |

|   |             |             |             |
|---|-------------|-------------|-------------|
| C | -3.18117400 | 3.40236000  | 2.43473300  |
| C | -3.02983000 | -0.78378300 | 3.38903200  |
| C | -4.28033600 | -2.65370000 | 2.29891500  |
| C | -5.46512000 | -0.53120900 | 2.88794500  |
| N | -3.41982600 | -0.05755900 | -0.95007000 |
| C | -5.73210500 | -0.82773500 | -0.36138500 |
| C | 6.88551400  | -3.26445200 | -0.45068400 |
| C | 8.14096600  | -1.21007400 | -0.63638100 |
| C | -3.55055400 | 0.41770600  | -2.32983700 |
| C | -6.73672200 | 0.13307200  | -0.20755800 |
| C | -6.06446800 | -2.11786400 | -0.78725500 |
| C | 8.09860700  | -2.60395500 | -0.64111100 |
| C | -2.12833200 | 0.67285000  | -2.83434700 |
| C | -4.33859700 | 1.73006100  | -2.36655200 |
| C | -4.23375400 | -0.61513600 | -3.23052900 |
| C | -8.06225600 | -0.19488500 | -0.48064900 |
| C | -7.39243200 | -2.44265100 | -1.05257900 |
| C | -8.39252000 | -1.48273300 | -0.90152900 |
| H | 1.67713800  | 4.40234600  | -1.64878900 |
| H | -0.64061700 | 5.18157300  | -1.93769300 |
| H | -2.53964600 | 4.04381800  | -0.84594000 |
| H | -3.96196000 | 2.94946100  | 0.47199300  |
| H | -4.11801100 | 1.64102300  | 1.63276900  |
| H | -2.72067900 | 2.88422700  | 3.28973300  |
| H | -2.49672100 | 4.20625800  | 2.12487100  |
| H | -4.12215300 | 3.86599700  | 2.77024800  |
| H | -2.06092600 | -1.16657000 | 3.03333100  |
| H | -2.93555100 | 0.30652900  | 3.50549600  |
| H | -3.24619100 | -1.21924400 | 4.37537300  |
| H | -4.54234600 | -3.07625900 | 3.28086700  |
| H | -5.07131400 | -2.93632100 | 1.58928600  |
| H | -3.33446800 | -3.10618900 | 1.97119600  |

|   |             |             |             |
|---|-------------|-------------|-------------|
| H | -5.41290300 | 0.56733400  | 2.92596000  |
| H | -6.31100500 | -0.81899500 | 2.24903300  |
| H | -5.67601200 | -0.89169900 | 3.90593600  |
| H | -1.62031400 | 1.43178700  | -2.22052100 |
| H | -1.52440000 | -0.24452000 | -2.79943500 |
| H | -2.16031300 | 1.03644000  | -3.87202300 |
| H | -4.37115500 | 2.12566400  | -3.39306100 |
| H | -5.37428700 | 1.58340000  | -2.02802400 |
| H | -3.85668100 | 2.48071300  | -1.72633100 |
| H | -3.72303900 | -1.58721900 | -3.17806500 |
| H | -5.28857300 | -0.76122000 | -2.96200400 |
| H | -4.19938200 | -0.26752000 | -4.27390600 |
| H | -6.47578500 | 1.13669000  | 0.13528500  |
| H | -8.84261900 | 0.55982500  | -0.35996300 |
| H | -9.43319900 | -1.73901000 | -1.11263800 |
| H | -7.64642700 | -3.45194300 | -1.38411700 |
| H | -5.27557000 | -2.86143000 | -0.91986300 |
| H | 3.85827400  | 0.71897200  | 4.40702900  |
| H | 3.70436900  | 1.87547900  | 3.05486200  |
| H | 2.52573400  | 0.54482800  | 3.22702600  |
| H | 6.62689500  | -0.33940300 | 2.14569000  |
| H | 6.09811700  | 1.35972100  | 2.31039000  |
| H | 6.19203700  | 0.30234900  | 3.74170700  |
| H | 3.22249000  | -1.83478800 | 2.68924500  |
| H | 4.93749100  | -2.20753100 | 2.32898300  |
| H | 4.47565300  | -1.67661600 | 3.96247500  |
| H | 2.22504900  | 1.44433200  | -2.65499100 |
| H | 2.14062200  | 0.25817400  | -3.98477800 |
| H | 1.40387900  | -0.11280500 | -2.40292700 |
| H | 5.71570300  | 0.07365000  | -2.76166500 |
| H | 4.68155400  | 0.50359200  | -4.14094500 |
| H | 4.73766400  | 1.56859300  | -2.71398800 |

|   |             |             |             |
|---|-------------|-------------|-------------|
| H | 2.83576000  | -2.30162900 | -2.41387800 |
| H | 3.52613000  | -1.78327300 | -3.97313300 |
| H | 4.60588600  | -2.17520000 | -2.61763400 |
| H | 4.75955900  | -3.04494900 | -0.11251300 |
| H | 6.84886300  | -4.35614700 | -0.45225400 |
| H | 9.01540700  | -3.17793800 | -0.79413300 |
| H | 9.08947700  | -0.68952400 | -0.78618900 |
| H | 7.00378200  | 0.61511000  | -0.42707700 |
| H | 4.42500200  | 2.26028600  | -0.32309200 |
| H | 3.53152500  | 3.30210500  | -1.42496200 |
| H | 3.99912400  | 3.80290400  | 1.57893300  |
| H | 4.77764300  | 4.67410400  | 0.22785100  |
| H | 3.03216500  | 4.86449400  | 0.53229400  |
| H | 0.25701800  | 1.61562000  | 1.31454700  |
| P | 0.87605400  | -0.68675500 | 1.35368600  |
| C | -0.64974300 | -0.94593800 | 0.34686700  |
| C | -0.70532000 | -2.38939200 | -0.25162200 |
| C | -2.02263200 | -2.75059300 | -0.94160300 |
| H | -1.97104600 | -3.78382100 | -1.32184300 |
| H | -2.87293700 | -2.70275700 | -0.24572800 |
| H | -2.23041700 | -2.09174200 | -1.79293300 |
| C | -0.49114700 | -3.43931700 | 0.85311700  |
| H | -1.28218000 | -3.36494200 | 1.61571600  |
| H | -0.50366500 | -4.46208200 | 0.43743200  |
| H | 0.47203800  | -3.27619800 | 1.35863300  |
| C | 0.40286200  | -2.56476900 | -1.29406000 |
| H | 0.21766500  | -1.91985900 | -2.16768300 |
| H | 1.36740700  | -2.27740700 | -0.84833100 |
| H | 0.46967700  | -3.60889100 | -1.64647100 |

IV.2 Int3  
0 1

|    |             |             |             |
|----|-------------|-------------|-------------|
| P  | 0.35016800  | 0.69778400  | 1.06488700  |
| Si | 1.75282800  | -0.29406400 | -0.20827200 |
| C  | -1.06513700 | -0.44542000 | 1.60403400  |
| N  | 2.96215900  | 1.03493400  | -0.67717700 |
| N  | 3.49922500  | -0.69804700 | 0.47778700  |
| N  | 1.59583600  | -1.42370500 | -1.53662800 |
| Si | -1.83463600 | -1.01945200 | -0.01716400 |
| C  | -0.76946600 | -1.48228400 | 2.72625600  |
| C  | 2.83278400  | 2.39736500  | -1.21655700 |
| C  | 3.93074900  | 0.48123200  | 0.07020000  |
| C  | 4.13309600  | -1.76979800 | 1.24959800  |
| C  | 2.68234200  | -1.54624900 | -2.49553100 |
| C  | 0.57787400  | -2.39415900 | -1.54080300 |
| N  | -2.70201600 | -2.58805200 | -0.18327900 |
| N  | -2.57329100 | 0.37480200  | -0.86561700 |
| C  | -0.65218700 | -2.14379900 | -0.95031000 |
| C  | 0.12981300  | -2.60487900 | 2.22371800  |
| C  | -0.08892300 | -0.77604600 | 3.90213100  |
| C  | -2.08024000 | -2.09297500 | 3.22379600  |
| C  | 1.58104000  | 2.37962500  | -2.08811500 |
| C  | 4.03430200  | 2.77193000  | -2.08580400 |
| C  | 2.65340700  | 3.40639300  | -0.07961300 |
| C  | 5.21654400  | 1.11617000  | 0.44252700  |
| C  | 3.54189400  | -3.08621300 | 0.73689900  |
| C  | 5.64899300  | -1.82672600 | 1.05189200  |
| C  | 3.81207200  | -1.57750100 | 2.73440500  |
| C  | 2.23747300  | -1.31429300 | -3.93071800 |
| C  | 0.77148300  | -3.66841500 | -2.13200900 |
| C  | -1.65150700 | -3.14646500 | -0.89524300 |
| C  | -3.99530500 | -3.18056400 | -0.02192900 |
| C  | -2.45895400 | 0.77390800  | -2.29878900 |
| C  | -3.57130000 | 0.90709000  | -0.05630000 |

|   |             |             |             |
|---|-------------|-------------|-------------|
| C | 5.31723500  | 1.73228300  | 1.69377500  |
| C | 6.32389800  | 1.07860200  | -0.40911900 |
| C | -0.24078500 | -4.62411800 | -2.09855700 |
| C | -1.47685600 | -4.40074800 | -1.48132300 |
| C | -4.96216400 | -2.86542800 | -1.15461200 |
| C | -1.41077000 | -0.08548100 | -2.99877300 |
| C | -2.03471300 | 2.23938700  | -2.48745800 |
| C | -3.80360600 | 0.52478000  | -2.98898000 |
| N | -4.11272300 | 0.09574200  | 0.78131200  |
| C | -3.75436600 | 2.39546800  | -0.09777300 |
| C | 6.52279000  | 2.30812200  | 2.08854300  |
| C | 7.52791300  | 1.64863700  | -0.00654200 |
| C | -5.03984600 | 0.42892100  | 1.86980700  |
| C | -4.85630400 | 3.04207600  | -0.66262200 |
| C | -2.72045500 | 3.16289900  | 0.45389200  |
| C | 7.62911000  | 2.26384000  | 1.24149300  |
| C | -5.50427300 | -0.90741000 | 2.45661100  |
| C | -6.30153300 | 1.16728000  | 1.40008900  |
| C | -4.34462100 | 1.24592500  | 2.96462000  |
| C | -4.92671800 | 4.43405800  | -0.67409000 |
| C | -2.80105800 | 4.55210600  | 0.45923800  |
| C | -3.90283200 | 5.19226700  | -0.10838000 |
| H | -1.75966000 | 0.29501500  | 2.03548600  |
| H | 1.71443600  | -3.92056500 | -2.61607100 |
| H | -0.05404100 | -5.59279200 | -2.57127500 |
| H | -2.25225300 | -5.16839100 | -1.46760200 |
| H | -3.87643700 | -4.27457800 | 0.08283300  |
| H | -4.42260400 | -2.82692900 | 0.92646500  |
| H | -5.14773400 | -1.78174200 | -1.19173500 |
| H | -4.54940200 | -3.18054500 | -2.12597000 |
| H | -5.92699200 | -3.37765200 | -1.00986000 |
| H | -0.42158400 | 0.02265300  | -2.53395800 |

|   |             |             |             |
|---|-------------|-------------|-------------|
| H | -1.67583800 | -1.15039000 | -2.98937900 |
| H | -1.33627800 | 0.23711600  | -4.04765800 |
| H | -1.68530000 | 2.38132900  | -3.52143800 |
| H | -2.84766000 | 2.95324100  | -2.31493600 |
| H | -1.21215200 | 2.48836400  | -1.80697600 |
| H | -4.07918500 | -0.53729000 | -2.91970500 |
| H | -4.60916500 | 1.11882700  | -2.53511900 |
| H | -3.74593700 | 0.80167500  | -4.05302700 |
| H | -6.06991900 | -1.47639000 | 1.70355300  |
| H | -4.64853900 | -1.51520500 | 2.77252600  |
| H | -6.15856800 | -0.74347000 | 3.32627900  |
| H | -7.07072900 | 1.11139400  | 2.18558600  |
| H | -6.11737400 | 2.22745900  | 1.19356400  |
| H | -6.70938700 | 0.69318000  | 0.49404600  |
| H | -3.46641800 | 0.71223100  | 3.35576800  |
| H | -4.01432100 | 2.22378700  | 2.58748900  |
| H | -5.03552600 | 1.42039000  | 3.80385400  |
| H | -5.66055900 | 2.45636300  | -1.11087000 |
| H | -5.78817000 | 4.92860200  | -1.12915300 |
| H | -3.96120700 | 6.28335900  | -0.11538900 |
| H | -1.98911400 | 5.13848100  | 0.89603300  |
| H | -1.83335600 | 2.65740900  | 0.84920600  |
| H | 1.02193000  | -2.17792200 | 1.74518000  |
| H | 0.46500700  | -3.24351200 | 3.05659200  |
| H | -0.37411200 | -3.24042000 | 1.48238300  |
| H | -0.72902700 | 0.02770900  | 4.30156100  |
| H | 0.11385700  | -1.48798600 | 4.71873200  |
| H | 0.85781200  | -0.31269900 | 3.58589000  |
| H | -2.62863400 | -2.57540900 | 2.40222300  |
| H | -1.88180500 | -2.85326900 | 3.99629700  |
| H | -2.72823100 | -1.32635200 | 3.67328900  |
| H | 1.38144100  | 3.38201900  | -2.49301000 |

|   |            |             |             |
|---|------------|-------------|-------------|
| H | 1.69707200 | 1.68096800  | -2.93004200 |
| H | 0.71607500 | 2.06098600  | -1.49011200 |
| H | 4.94712100 | 2.92619700  | -1.49647200 |
| H | 4.22596800 | 1.99447000  | -2.84145100 |
| H | 3.81733300 | 3.71209900  | -2.61439400 |
| H | 1.80281600 | 3.11331900  | 0.55443900  |
| H | 3.55670900 | 3.46480300  | 0.54498300  |
| H | 2.46142100 | 4.40961300  | -0.48959000 |
| H | 3.83166800 | -3.25883300 | -0.30959000 |
| H | 3.91431000 | -3.92607600 | 1.34117200  |
| H | 2.44549600 | -3.09496300 | 0.78524500  |
| H | 6.17193600 | -0.98184700 | 1.51743100  |
| H | 6.02798600 | -2.74956500 | 1.51533100  |
| H | 5.90880000 | -1.85474700 | -0.01701700 |
| H | 2.72815000 | -1.52980600 | 2.90100600  |
| H | 4.22023700 | -2.41153500 | 3.32515800  |
| H | 4.25683100 | -0.64310200 | 3.10730900  |
| H | 4.44509600 | 1.75860300  | 2.35141000  |
| H | 6.59780300 | 2.79169500  | 3.06501400  |
| H | 8.57529700 | 2.71096800  | 1.55462500  |
| H | 8.39392700 | 1.61181400  | -0.67108400 |
| H | 6.24231600 | 0.59288700  | -1.38365000 |
| H | 3.44815400 | -0.80235000 | -2.23301700 |
| H | 3.17683400 | -2.53030400 | -2.40338200 |
| H | 1.83620400 | -0.29720800 | -4.05187800 |
| H | 3.08286300 | -1.43910300 | -4.62513700 |
| H | 1.44741400 | -2.02168200 | -4.22144200 |

IV.2 Int4  
0 1

|    |            |             |            |
|----|------------|-------------|------------|
| Si | 1.44881100 | 0.39085100  | 0.32392500 |
| N  | 3.10280700 | -0.24296900 | 1.06696600 |



|    |             |             |             |
|----|-------------|-------------|-------------|
| N  | 2.77783400  | 0.12848700  | -1.01772000 |
| N  | 1.60171700  | 2.16153600  | 0.57604900  |
| Si | -1.82204800 | 0.93811800  | -0.60921900 |
| C  | 3.40247200  | -0.92783100 | 2.32725400  |
| C  | 3.59678500  | -0.46339300 | -0.16005900 |
| C  | 2.78555500  | 0.31108600  | -2.46473000 |
| C  | 2.89201500  | 2.81510200  | 0.68211300  |
| C  | 0.46752800  | 2.96046600  | 0.39584100  |
| N  | -2.84046200 | 2.39768000  | -0.79660100 |
| N  | -2.32667100 | -0.21235600 | 0.75586000  |
| C  | -0.75406500 | 2.41103200  | -0.00250500 |
| C  | 2.42785200  | -0.37274000 | 3.36673300  |
| C  | 4.83431000  | -0.63528600 | 2.78254700  |
| C  | 3.17969300  | -2.43908300 | 2.20428000  |
| C  | 4.78189000  | -1.28420100 | -0.51799300 |
| C  | 1.94470900  | 1.56154200  | -2.73906200 |
| C  | 4.19753000  | 0.52551200  | -3.01039500 |
| C  | 2.12718400  | -0.89714800 | -3.13965600 |
| C  | 3.28121600  | 3.24426500  | 2.08951100  |
| C  | 0.50374300  | 4.36934900  | 0.58669200  |
| C  | -1.85785100 | 3.24438000  | -0.27790300 |
| C  | -4.22076300 | 2.74664000  | -0.93079500 |
| C  | -2.11955000 | -0.29574700 | 2.21561900  |
| C  | -3.20670500 | -0.90742600 | 0.00189800  |
| C  | 4.62143600  | -2.57170200 | -1.04111900 |
| C  | 6.06845200  | -0.75401000 | -0.37700600 |
| C  | -0.62275000 | 5.15516100  | 0.36311000  |
| C  | -1.83886500 | 4.62435500  | -0.08230500 |
| C  | -4.97599400 | 2.78263800  | 0.39317700  |
| C  | -1.39279300 | 0.96471100  | 2.68051000  |
| C  | -1.26218500 | -1.51789500 | 2.55908800  |
| C  | -3.45575400 | -0.35713500 | 2.96361200  |

|   |             |             |             |
|---|-------------|-------------|-------------|
| N | -3.30679900 | -0.33488900 | -1.17112100 |
| C | -3.89823900 | -2.15700900 | 0.41934100  |
| C | 5.73519300  | -3.31980200 | -1.41519500 |
| C | 7.17997300  | -1.50077600 | -0.75910900 |
| C | -3.82249900 | -0.84451100 | -2.44157100 |
| C | -5.26503900 | -2.14568000 | 0.71625900  |
| C | -3.19131900 | -3.36212800 | 0.48146600  |
| C | 7.01553100  | -2.78461800 | -1.27791400 |
| C | -3.38794300 | 0.15547600  | -3.51775200 |
| C | -5.35221900 | -0.92515800 | -2.42911600 |
| C | -3.22593000 | -2.21440600 | -2.78385400 |
| C | -5.91330500 | -3.32259500 | 1.08174400  |
| C | -3.84433100 | -4.54035800 | 0.83617000  |
| C | -5.20472600 | -4.52223600 | 1.14043500  |
| H | 1.41501800  | 4.86031400  | 0.92569900  |
| H | -0.54432800 | 6.23298300  | 0.53434300  |
| H | -2.70158100 | 5.26205500  | -0.28431000 |
| H | -4.30938500 | 3.72685300  | -1.43687100 |
| H | -4.69834200 | 2.01444200  | -1.60056400 |
| H | -4.97580300 | 1.78522000  | 0.86022300  |
| H | -4.49754000 | 3.48176100  | 1.09661500  |
| H | -6.02237900 | 3.09876400  | 0.25416100  |
| H | -0.40036200 | 1.05155700  | 2.21995200  |
| H | -1.95785900 | 1.87249100  | 2.42679100  |
| H | -1.26589500 | 0.92307400  | 3.77253700  |
| H | -0.96487500 | -1.49019100 | 3.61859800  |
| H | -1.80778900 | -2.45625200 | 2.39102900  |
| H | -0.35617700 | -1.51251700 | 1.93424200  |
| H | -4.10316300 | 0.48222700  | 2.66732000  |
| H | -3.99447000 | -1.29726300 | 2.79184200  |
| H | -3.27081900 | -0.27594000 | 4.04510000  |
| H | -3.75419900 | 1.16635000  | -3.29100700 |

|   |             |             |             |
|---|-------------|-------------|-------------|
| H | -2.29220200 | 0.20529700  | -3.58641800 |
| H | -3.78351400 | -0.14779800 | -4.49837500 |
| H | -5.72567100 | -1.17353400 | -3.43439200 |
| H | -5.71065400 | -1.69894800 | -1.73719000 |
| H | -5.78852700 | 0.03985600  | -2.13014400 |
| H | -2.12697300 | -2.17288700 | -2.73562300 |
| H | -3.57747200 | -2.99718800 | -2.09798500 |
| H | -3.51461600 | -2.50843600 | -3.80473700 |
| H | -5.81490500 | -1.20304500 | 0.67535100  |
| H | -6.97875100 | -3.30248100 | 1.32185000  |
| H | -5.71481600 | -5.44589800 | 1.42350100  |
| H | -3.28608600 | -5.47853500 | 0.87545100  |
| H | -2.12737500 | -3.37244500 | 0.23619800  |
| H | 2.59460400  | -0.85607200 | 4.34044400  |
| H | 2.55320000  | 0.71129900  | 3.49123300  |
| H | 1.38766600  | -0.55905200 | 3.06422100  |
| H | 5.57620800  | -1.09871200 | 2.11854400  |
| H | 5.01518600  | 0.44979700  | 2.80706500  |
| H | 4.99573300  | -1.03453400 | 3.79541400  |
| H | 2.15764500  | -2.64267500 | 1.84929500  |
| H | 3.89224800  | -2.89692600 | 1.50382600  |
| H | 3.30903800  | -2.92772000 | 3.18230100  |
| H | 2.40034300  | 2.44983900  | -2.27880800 |
| H | 1.85823300  | 1.73228100  | -3.82230800 |
| H | 0.92893100  | 1.45625200  | -2.32743800 |
| H | 4.81683800  | -0.37864000 | -2.93816200 |
| H | 4.13875300  | 0.80911100  | -4.07185100 |
| H | 4.70371100  | 1.33871000  | -2.46821000 |
| H | 1.11963400  | -1.05586600 | -2.72634800 |
| H | 2.03777000  | -0.73277300 | -4.22456300 |
| H | 2.72010700  | -1.80988900 | -2.98150900 |
| H | 3.61725600  | -2.98783000 | -1.14747200 |

|   |             |             |             |
|---|-------------|-------------|-------------|
| H | 5.60218100  | -4.32641900 | -1.81827100 |
| H | 7.88814900  | -3.37002200 | -1.57669400 |
| H | 8.18098200  | -1.07651000 | -0.65309800 |
| H | 6.19167000  | 0.25523300  | 0.02195000  |
| H | 3.65946100  | 2.12557100  | 0.29673600  |
| H | 2.91200600  | 3.68979100  | 0.00713800  |
| H | 3.39584300  | 2.36797200  | 2.74255900  |
| H | 4.24012100  | 3.78710300  | 2.08091200  |
| H | 2.52101800  | 3.89848600  | 2.54038500  |
| H | -0.97813500 | 0.27127600  | -1.65658400 |

IV.2 Int5

0 1

|    |             |             |             |
|----|-------------|-------------|-------------|
| Si | -1.69992400 | 0.01520300  | 0.03415900  |
| N  | -3.04733500 | -1.12518500 | -0.58598400 |
| N  | -3.59099300 | 0.66006400  | 0.50482000  |
| N  | -1.34342300 | 1.23883000  | -1.18893200 |
| Si | 2.35428500  | 1.10328300  | 0.16016500  |
| C  | -3.01340000 | -2.45550700 | -1.21688000 |
| C  | -4.06377000 | -0.43960900 | -0.02578100 |
| C  | -4.30594000 | 1.82964800  | 1.02621600  |
| C  | -2.29580700 | 1.37076600  | -2.28460800 |
| C  | -0.42063300 | 2.29704000  | -1.01619700 |
| N  | 2.97026600  | 2.75917400  | -0.01972200 |
| N  | 2.87604600  | -0.29640500 | -0.90102600 |
| C  | 0.88673100  | 2.12665500  | -0.55785600 |
| C  | -1.90995800 | -2.42378900 | -2.27958600 |
| C  | -4.31685000 | -2.81516900 | -1.93536500 |
| C  | -2.71417300 | -3.52463100 | -0.16087000 |
| C  | -5.47357100 | -0.90323300 | 0.03377800  |
| C  | -3.24647000 | 2.78819400  | 1.56601600  |
| C  | -5.07301700 | 2.54237200  | -0.09358400 |

|   |             |             |             |
|---|-------------|-------------|-------------|
| C | -5.28187300 | 1.47012800  | 2.15235700  |
| C | -1.65076900 | 1.40495000  | -3.66048500 |
| C | -0.81633100 | 3.61511700  | -1.37835200 |
| C | 1.75241200  | 3.24847800  | -0.49236400 |
| C | 4.20646400  | 3.47683000  | -0.06575000 |
| C | 2.63845100  | -0.70745200 | -2.30018800 |
| C | 3.93593500  | -0.66731500 | -0.13143700 |
| C | -5.86316700 | -1.71096600 | 1.10742800  |
| C | -6.40842000 | -0.55498200 | -0.94449400 |
| C | 0.06053300  | 4.68890500  | -1.30173500 |
| C | 1.37939700  | 4.53791300  | -0.86036500 |
| C | 4.79397100  | 3.59077800  | -1.46757300 |
| C | 1.46929900  | 0.10029200  | -2.84621900 |
| C | 2.28275600  | -2.19365800 | -2.41806000 |
| C | 3.88445800  | -0.39688700 | -3.13580500 |
| N | 4.16453100  | 0.25234300  | 0.76245900  |
| C | 4.58720100  | -1.99926200 | -0.21717900 |
| C | -7.17532000 | -2.16768500 | 1.19805700  |
| C | -7.72048900 | -1.01157900 | -0.84943100 |
| C | 4.94206800  | 0.18787700  | 2.00243600  |
| C | 5.90515200  | -2.14954000 | -0.65393900 |
| C | 3.86229500  | -3.11930900 | 0.20906300  |
| C | -8.10627400 | -1.81886600 | 0.22004200  |
| C | 4.36018200  | 1.25134700  | 2.94060300  |
| C | 6.40344500  | 0.52954300  | 1.69435900  |
| C | 4.86199100  | -1.16522300 | 2.71755100  |
| C | 6.49723400  | -3.41184200 | -0.66486800 |
| C | 4.46229900  | -4.37395000 | 0.21125300  |
| C | 5.77941900  | -4.52305900 | -0.22680900 |
| H | -1.82800100 | 3.79941100  | -1.73921800 |
| H | -0.29514500 | 5.67956300  | -1.59957100 |
| H | 2.06851700  | 5.38336600  | -0.81635100 |

|   |             |             |             |
|---|-------------|-------------|-------------|
| H | 4.06852700  | 4.48659800  | 0.36589600  |
| H | 4.92590200  | 2.96201000  | 0.58859100  |
| H | 5.02546500  | 2.59081300  | -1.86613000 |
| H | 4.08063200  | 4.07035500  | -2.15536800 |
| H | 5.72161000  | 4.18496300  | -1.46703500 |
| H | 0.56162300  | -0.05581700 | -2.24749200 |
| H | 1.68342100  | 1.17777200  | -2.84674200 |
| H | 1.26784800  | -0.21361200 | -3.88097400 |
| H | 1.93780400  | -2.40399700 | -3.44166300 |
| H | 3.13723000  | -2.85045100 | -2.21372100 |
| H | 1.47095100  | -2.44820100 | -1.72156900 |
| H | 4.13745000  | 0.67162400  | -3.06292300 |
| H | 4.75155700  | -0.98722300 | -2.80605300 |
| H | 3.70241400  | -0.63534400 | -4.19478600 |
| H | 4.31792000  | 2.23465800  | 2.45282900  |
| H | 3.33794300  | 0.98676900  | 3.24582100  |
| H | 4.97927800  | 1.33533900  | 3.84602800  |
| H | 6.98804900  | 0.59011600  | 2.62510200  |
| H | 6.86050800  | -0.23982100 | 1.05611000  |
| H | 6.47734800  | 1.49711300  | 1.17612100  |
| H | 3.81383800  | -1.48099300 | 2.83140400  |
| H | 5.40754600  | -1.95784600 | 2.18982500  |
| H | 5.29964100  | -1.07055300 | 3.72304500  |
| H | 6.46629600  | -1.27591300 | -0.99271200 |
| H | 7.52583600  | -3.52595500 | -1.01457600 |
| H | 6.24683200  | -5.51061000 | -0.22852600 |
| H | 3.89730300  | -5.24355600 | 0.55472700  |
| H | 2.82949200  | -2.98809200 | 0.54497900  |
| H | -1.79608600 | -3.41996600 | -2.73209800 |
| H | -2.16566800 | -1.71032300 | -3.07731000 |
| H | -0.94832800 | -2.12215300 | -1.84648700 |
| H | -5.14658700 | -3.02449700 | -1.24935900 |

|   |             |             |             |
|---|-------------|-------------|-------------|
| H | -4.62584400 | -2.01710500 | -2.62643200 |
| H | -4.14105600 | -3.72387500 | -2.53013500 |
| H | -1.75788100 | -3.32590100 | 0.34419500  |
| H | -3.50718200 | -3.54300900 | 0.60230300  |
| H | -2.66170900 | -4.52206500 | -0.62388100 |
| H | -2.48135700 | 3.00376000  | 0.80572000  |
| H | -3.71378400 | 3.73702600  | 1.86708300  |
| H | -2.74781100 | 2.36379000  | 2.44575300  |
| H | -5.87042600 | 1.90907200  | -0.50444400 |
| H | -5.54225600 | 3.45734300  | 0.29848700  |
| H | -4.39484700 | 2.83025200  | -0.90840600 |
| H | -4.78392500 | 0.87889200  | 2.93411600  |
| H | -5.66232000 | 2.39312800  | 2.61563900  |
| H | -6.14560900 | 0.89967000  | 1.78600300  |
| H | -5.13190300 | -1.97262800 | 1.87572800  |
| H | -7.47312500 | -2.79760400 | 2.03931500  |
| H | -9.13578700 | -2.17697500 | 0.29167300  |
| H | -8.44591100 | -0.73821000 | -1.61898800 |
| H | -6.10219600 | 0.06116400  | -1.79227300 |
| H | -2.97821300 | 0.51115400  | -2.23833800 |
| H | -2.93938400 | 2.25978900  | -2.16079400 |
| H | -1.14484800 | 0.45476700  | -3.88157500 |
| H | -2.41437100 | 1.57875200  | -4.43503800 |
| H | -0.90528700 | 2.21042200  | -3.73161600 |
| P | 0.02194500  | -1.37964500 | 0.55088700  |
| C | -0.80757400 | -0.29710100 | 1.57728900  |
| C | -0.68091600 | -0.05808600 | 3.06465900  |
| C | -0.21967100 | 1.38396600  | 3.31961900  |
| H | -0.21405500 | 1.59866900  | 4.40088000  |
| H | 0.79595900  | 1.54156200  | 2.93110400  |
| H | -0.87025900 | 2.11418000  | 2.82253900  |
| C | 0.33615500  | -1.02055800 | 3.67789000  |

|   |             |             |            |
|---|-------------|-------------|------------|
| H | 1.32505900  | -0.89366000 | 3.21006100 |
| H | 0.43853400  | -0.84039700 | 4.75978900 |
| H | 0.03323700  | -2.06831200 | 3.52571600 |
| C | -2.05286300 | -0.29524800 | 3.70646600 |
| H | -2.80879900 | 0.37146400  | 3.27129900 |
| H | -2.38426100 | -1.33255400 | 3.53875000 |
| H | -2.01369400 | -0.11742300 | 4.79375600 |
| H | 1.87890900  | 0.60567200  | 1.47123100 |

#### IV.2 Int6

0 1

|    |             |             |             |
|----|-------------|-------------|-------------|
| P  | 0.38326200  | 0.74964400  | 1.06873700  |
| Si | 1.86883800  | -0.43514200 | -0.38668800 |
| C  | -0.99073100 | -0.18045400 | 1.58772500  |
| N  | 3.12636300  | 0.79846900  | -0.97459700 |
| N  | 3.49015800  | -0.74121900 | 0.47063200  |
| N  | 1.64699800  | -1.67708400 | -1.58020900 |
| Si | -1.73449000 | -0.97584900 | 0.12969300  |
| C  | -0.95950100 | -0.80574500 | 2.98842900  |
| C  | 3.03901400  | 2.06504700  | -1.71124300 |
| C  | 3.98341400  | 0.38999900  | -0.02318300 |
| C  | 3.97168900  | -1.69107800 | 1.47440200  |
| C  | 2.68443000  | -1.97670900 | -2.55364300 |
| C  | 0.61435700  | -2.61597700 | -1.34089900 |
| N  | -2.57247200 | -2.56185600 | 0.25062700  |
| N  | -2.50308700 | 0.25298200  | -0.91660600 |
| C  | -0.56724400 | -2.23719200 | -0.70994400 |
| C  | -0.24021500 | -2.16310900 | 2.99222900  |
| C  | -0.27022100 | 0.11914700  | 3.99682800  |
| C  | -2.39540500 | -1.02895700 | 3.46468200  |
| C  | 1.94680500  | 1.85310100  | -2.75633300 |
| C  | 4.35487200  | 2.37628800  | -2.42503800 |



|   |             |             |             |
|---|-------------|-------------|-------------|
| C | 2.65215000  | 3.21437900  | -0.77749400 |
| C | 5.16886000  | 1.12166400  | 0.48044500  |
| C | 3.17665100  | -2.97653200 | 1.23685000  |
| C | 5.46050300  | -1.98240900 | 1.28766500  |
| C | 3.70566300  | -1.15162800 | 2.88151900  |
| C | 2.17047200  | -2.01138000 | -3.98382600 |
| C | 0.77090900  | -3.97125300 | -1.71808400 |
| C | -1.55604900 | -3.21497500 | -0.42009900 |
| C | -3.86192300 | -3.12742700 | 0.51264500  |
| C | -2.38146300 | 0.49333500  | -2.38050900 |
| C | -3.54711200 | 0.90045600  | -0.22620500 |
| C | 5.02901000  | 1.93548900  | 1.60995000  |
| C | 6.41544900  | 0.99659300  | -0.14013600 |
| C | -0.23597600 | -4.89730600 | -1.45650900 |
| C | -1.42103300 | -4.55239000 | -0.80300300 |
| C | -4.80451700 | -3.07197300 | -0.68152000 |
| C | -1.42538600 | -0.51330100 | -3.01251500 |
| C | -1.83829500 | 1.89636900  | -2.70163500 |
| C | -3.75209500 | 0.29394200  | -3.03645700 |
| N | -4.31029700 | 0.18406600  | 0.50661200  |
| C | -3.54345600 | 2.40239300  | -0.28633600 |
| C | 6.13276300  | 2.62250600  | 2.11064500  |
| C | 7.51590000  | 1.68106600  | 0.36830400  |
| C | -5.39672700 | 0.65722500  | 1.37312900  |
| C | -4.47099400 | 3.17925600  | -0.98516700 |
| C | -2.52485100 | 3.04110900  | 0.43133500  |
| C | 7.37574900  | 2.49480300  | 1.49249600  |
| C | -5.81970600 | -0.54077300 | 2.23029900  |
| C | -6.60634500 | 1.04346100  | 0.51202400  |
| C | -5.01454500 | 1.81269800  | 2.30705400  |
| C | -4.38314700 | 4.57094800  | -0.96661700 |
| C | -2.44495300 | 4.42949700  | 0.45992300  |

|   |             |             |             |
|---|-------------|-------------|-------------|
| C | -3.37237200 | 5.20037700  | -0.24248400 |
| H | 1.67954200  | -4.30870300 | -2.21624200 |
| H | -0.08543400 | -5.93377200 | -1.77208200 |
| H | -2.19908800 | -5.29262500 | -0.60979200 |
| H | -3.73478300 | -4.17208900 | 0.85268600  |
| H | -4.31058300 | -2.58338300 | 1.35407100  |
| H | -4.99184200 | -2.02055000 | -0.94554200 |
| H | -4.36765800 | -3.58157400 | -1.55492300 |
| H | -5.76900500 | -3.55304800 | -0.45180900 |
| H | -0.40581900 | -0.42134300 | -2.61482300 |
| H | -1.75483700 | -1.54837300 | -2.85416500 |
| H | -1.38489600 | -0.32657800 | -4.09620500 |
| H | -1.50415900 | 1.93543200  | -3.74992200 |
| H | -2.57876300 | 2.69058900  | -2.55818600 |
| H | -0.98112600 | 2.12879700  | -2.05497700 |
| H | -4.11357400 | -0.72872500 | -2.85500500 |
| H | -4.50254600 | 0.99150600  | -2.63971900 |
| H | -3.68752600 | 0.45635200  | -4.12350200 |
| H | -6.13635000 | -1.37486400 | 1.58758300  |
| H | -4.99093700 | -0.88606900 | 2.86074500  |
| H | -6.66238700 | -0.26917000 | 2.88404900  |
| H | -7.49272100 | 1.18582400  | 1.14942200  |
| H | -6.43453800 | 1.97796900  | -0.03520200 |
| H | -6.82850500 | 0.24517400  | -0.21257900 |
| H | -4.05884400 | 1.60224700  | 2.80899800  |
| H | -4.91729000 | 2.76942800  | 1.77939000  |
| H | -5.78958400 | 1.93265700  | 3.07966900  |
| H | -5.25714000 | 2.70006300  | -1.57102500 |
| H | -5.10973400 | 5.16607600  | -1.52514000 |
| H | -3.30740600 | 6.29107000  | -0.22593900 |
| H | -1.65231000 | 4.91382200  | 1.03589200  |
| H | -1.81856400 | 2.41996800  | 0.99032700  |

|   |             |             |             |
|---|-------------|-------------|-------------|
| H | 0.80918400  | -2.04350200 | 2.68697900  |
| H | -0.24589100 | -2.62538100 | 3.99479900  |
| H | -0.71611200 | -2.86232000 | 2.28839000  |
| H | -0.77408200 | 1.09748500  | 4.03269500  |
| H | -0.28780400 | -0.32239500 | 5.00676000  |
| H | 0.78294600  | 0.30317900  | 3.72903900  |
| H | -2.93154700 | -1.69380300 | 2.77336800  |
| H | -2.41425200 | -1.49070500 | 4.46620100  |
| H | -2.93809100 | -0.07464500 | 3.51077800  |
| H | 1.77191800  | 2.77727700  | -3.32497300 |
| H | 2.22640400  | 1.05683500  | -3.46110200 |
| H | 0.99728800  | 1.56988900  | -2.28056700 |
| H | 5.15644400  | 2.63535200  | -1.72127600 |
| H | 4.68089800  | 1.51816900  | -3.03235100 |
| H | 4.21030600  | 3.23476200  | -3.09745400 |
| H | 1.72517900  | 2.98195400  | -0.23236900 |
| H | 3.44461300  | 3.40903300  | -0.04075400 |
| H | 2.49381400  | 4.13702100  | -1.35577700 |
| H | 3.39349400  | -3.39501300 | 0.24329300  |
| H | 3.43138300  | -3.72930600 | 1.99630900  |
| H | 2.09182700  | -2.79946400 | 1.29257200  |
| H | 6.08706600  | -1.11410300 | 1.53138200  |
| H | 5.75582800  | -2.80633500 | 1.95378300  |
| H | 5.66994300  | -2.28949900 | 0.25158000  |
| H | 2.64663400  | -0.88360100 | 3.00227400  |
| H | 3.95719900  | -1.91152600 | 3.63630100  |
| H | 4.31418700  | -0.25812200 | 3.08184000  |
| H | 4.05057300  | 2.02963700  | 2.08730200  |
| H | 6.01960900  | 3.26011700  | 2.99018600  |
| H | 8.24049100  | 3.03184500  | 1.88878400  |
| H | 8.48934400  | 1.57820700  | -0.11618700 |
| H | 6.52105400  | 0.35679200  | -1.01878500 |

|   |             |             |             |
|---|-------------|-------------|-------------|
| H | 3.45668200  | -1.19737700 | -2.46004500 |
| H | 3.18836600  | -2.92921500 | -2.30493200 |
| H | 1.74385700  | -1.03766600 | -4.26711500 |
| H | 2.98491100  | -2.25226700 | -4.68438600 |
| H | 1.38033200  | -2.76650000 | -4.10299600 |
| H | -0.10542100 | 1.33732000  | -0.14613900 |

#### IV.2 TS 1-2 C

0 1

|    |             |             |             |
|----|-------------|-------------|-------------|
| Si | 1.77604200  | 0.20636400  | 0.87386900  |
| N  | 3.45711000  | -0.61105000 | 1.13761100  |
| N  | 2.87234900  | -0.00284800 | -0.85614500 |
| N  | 2.23346600  | 1.97079000  | 1.00254200  |
| Si | -1.82661500 | 0.47363200  | -0.24909500 |
| C  | 4.09893200  | -1.22872700 | 2.31147700  |
| C  | 3.82720300  | -0.56784800 | -0.15425400 |
| C  | 2.90963100  | 0.54211500  | -2.21770100 |
| C  | 3.55347300  | 2.44062500  | 1.36026900  |
| C  | 1.34787200  | 2.86841400  | 0.45291800  |
| N  | -2.07049300 | 2.20916400  | -0.58064500 |
| N  | -3.26202800 | 0.07770100  | 0.92517000  |
| C  | 0.00759500  | 2.47558700  | 0.46203800  |
| C  | 3.66337900  | -0.43559000 | 3.54827800  |
| C  | 5.62850600  | -1.18107100 | 2.25206500  |
| C  | 3.64267500  | -2.68115100 | 2.46665500  |
| C  | 5.09029100  | -1.13405900 | -0.69667800 |
| C  | 1.51985500  | 1.10278500  | -2.53102400 |
| C  | 3.90236500  | 1.70709400  | -2.30701500 |
| C  | 3.28010700  | -0.52241700 | -3.25671500 |
| C  | 3.54329200  | 3.35282500  | 2.57778800  |
| C  | 1.65868800  | 4.07954600  | -0.20311000 |
| C  | -0.92947900 | 2.99439300  | -0.41965900 |

|   |             |             |             |
|---|-------------|-------------|-------------|
| C | -3.30578500 | 2.84363500  | -0.99399300 |
| C | -3.53935900 | 0.21765900  | 2.36264700  |
| C | -3.98991000 | -0.43383800 | -0.06169000 |
| C | 5.10462700  | -2.47387900 | -1.09867400 |
| C | 6.25388000  | -0.36810300 | -0.81095700 |
| C | 0.66210900  | 4.71221100  | -0.95026300 |
| C | -0.61530700 | 4.17193600  | -1.12071100 |
| C | -3.84221200 | 3.85385500  | 0.00806000  |
| C | -2.59981900 | 1.30779200  | 2.87720300  |
| C | -3.25705100 | -1.09342300 | 3.09748600  |
| C | -4.98423800 | 0.65896600  | 2.61115700  |
| N | -3.32856200 | -0.22643600 | -1.20430100 |
| C | -5.26438500 | -1.18441500 | 0.08896700  |
| C | 6.27052600  | -3.03997200 | -1.60801900 |
| C | 7.41711100  | -0.93591100 | -1.32374800 |
| C | -3.67263000 | -0.54406400 | -2.59481800 |
| C | -6.50037300 | -0.54228700 | -0.03917300 |
| C | -5.22204300 | -2.55211600 | 0.37603800  |
| C | 7.42883500  | -2.27218700 | -1.72262700 |
| C | -2.68973000 | 0.23211400  | -3.47559600 |
| C | -5.08777700 | -0.07574800 | -2.95305300 |
| C | -3.56177200 | -2.04779500 | -2.86372400 |
| C | -7.68103000 | -1.26186900 | 0.11609500  |
| C | -6.40714400 | -3.27014600 | 0.52709300  |
| C | -7.63657800 | -2.62744000 | 0.39808100  |
| H | 2.66349100  | 4.50240200  | -0.17436500 |
| H | 0.91222000  | 5.64079200  | -1.47132600 |
| H | -1.32825100 | 4.64502800  | -1.79720800 |
| H | -3.16432500 | 3.33520000  | -1.97589200 |
| H | -4.05176600 | 2.05530100  | -1.16142100 |
| H | -4.08264800 | 3.36667400  | 0.96431900  |
| H | -3.10394800 | 4.64414500  | 0.20979300  |

|   |             |             |             |
|---|-------------|-------------|-------------|
| H | -4.75751100 | 4.33198400  | -0.37446200 |
| H | -1.54684400 | 0.99495400  | 2.75997400  |
| H | -2.75588000 | 2.25570000  | 2.34324100  |
| H | -2.77422000 | 1.47577600  | 3.94990800  |
| H | -3.45930600 | -0.97036200 | 4.17229600  |
| H | -3.89802500 | -1.90426600 | 2.72126900  |
| H | -2.19873800 | -1.37574000 | 2.98375800  |
| H | -5.24162600 | 1.53544600  | 1.99668800  |
| H | -5.71026500 | -0.13873000 | 2.40919100  |
| H | -5.09145000 | 0.94415200  | 3.66785100  |
| H | -2.81302500 | 1.31548400  | -3.33868700 |
| H | -1.64494700 | -0.01593400 | -3.24499000 |
| H | -2.86589300 | -0.00620400 | -4.53435500 |
| H | -5.23256200 | -0.16481300 | -4.04000100 |
| H | -5.86114600 | -0.68186500 | -2.46547900 |
| H | -5.23864300 | 0.97917800  | -2.67968100 |
| H | -2.54829000 | -2.41481800 | -2.66101100 |
| H | -4.26702800 | -2.60902600 | -2.23365700 |
| H | -3.80297700 | -2.26347000 | -3.91577300 |
| H | -6.53354600 | 0.52802300  | -0.25211500 |
| H | -8.64240600 | -0.75268400 | 0.01880200  |
| H | -8.56432200 | -3.19113700 | 0.51987000  |
| H | -6.36642000 | -4.33850600 | 0.75052000  |
| H | -4.25732700 | -3.05246900 | 0.48203000  |
| H | 4.05390800  | -0.92368800 | 4.45349000  |
| H | 4.05495500  | 0.59118700  | 3.52011300  |
| H | 2.56894900  | -0.38633800 | 3.62447200  |
| H | 6.05188100  | -1.86486300 | 1.50598000  |
| H | 5.99154700  | -0.16436000 | 2.03914100  |
| H | 6.02257500  | -1.47783800 | 3.23561100  |
| H | 2.55578700  | -2.71731000 | 2.62097500  |
| H | 3.89489400  | -3.27125100 | 1.57298500  |

|   |             |             |             |
|---|-------------|-------------|-------------|
| H | 4.13767700  | -3.14491100 | 3.33396600  |
| H | 1.27510300  | 1.94115800  | -1.86691400 |
| H | 1.49522500  | 1.47297400  | -3.56653500 |
| H | 0.74076800  | 0.34311500  | -2.41147700 |
| H | 4.93671500  | 1.37371400  | -2.14949400 |
| H | 3.84795400  | 2.17159700  | -3.30352500 |
| H | 3.65143600  | 2.47516700  | -1.56269700 |
| H | 2.62155800  | -1.39975200 | -3.18093700 |
| H | 3.17170200  | -0.10333100 | -4.26865200 |
| H | 4.31789300  | -0.86358400 | -3.14537100 |
| H | 4.19270200  | -3.06943700 | -1.01513400 |
| H | 6.27312900  | -4.08708500 | -1.91930200 |
| H | 8.34320600  | -2.71613300 | -2.12290300 |
| H | 8.32303000  | -0.33124300 | -1.40777300 |
| H | 6.25107400  | 0.67216100  | -0.47954500 |
| H | 4.18704200  | 1.56708600  | 1.55711000  |
| H | 4.02750400  | 2.96342200  | 0.50649000  |
| H | 3.13712600  | 2.82136700  | 3.45140900  |
| H | 4.56003900  | 3.70148100  | 2.81939100  |
| H | 2.91174500  | 4.23731800  | 2.40469500  |
| H | -0.26077700 | 1.67466600  | 1.15880900  |
| P | 0.32709300  | -0.62027200 | 2.26922200  |
| C | 0.10970700  | -0.67016200 | 0.43806000  |
| C | -0.07010900 | -2.05945100 | -0.24413000 |
| C | -0.04766100 | -1.97777200 | -1.76380500 |
| H | -0.29039400 | -2.95246300 | -2.21797700 |
| H | -0.77348300 | -1.24082500 | -2.13063600 |
| H | 0.94631600  | -1.67639000 | -2.11430100 |
| C | -1.35960200 | -2.73350100 | 0.22839600  |
| H | -2.24446300 | -2.22977400 | -0.18097100 |
| H | -1.39732700 | -3.78316100 | -0.10693400 |
| H | -1.41328800 | -2.71789300 | 1.32778800  |

|   |            |             |             |
|---|------------|-------------|-------------|
| C | 1.08293100 | -2.98514100 | 0.16027500  |
| H | 2.05643900 | -2.53607600 | -0.07781900 |
| H | 1.05535100 | -3.18438100 | 1.23867800  |
| H | 1.00329800 | -3.94043800 | -0.38554700 |

IV.2 TS 1-2 P  
O 1

|    |             |             |             |
|----|-------------|-------------|-------------|
| Si | -2.11834900 | -0.62788300 | -0.10863400 |
| N  | -2.65572700 | 1.12555800  | 0.50688600  |
| N  | -3.93810900 | -0.20095500 | -0.59260200 |
| N  | -2.30865200 | -1.58510200 | 1.39708200  |
| Si | 2.09369300  | -0.49773900 | 0.09949100  |
| C  | -2.04708300 | 2.23296700  | 1.24605100  |
| C  | -3.83405800 | 1.02365500  | -0.08387000 |
| C  | -4.92464600 | -0.79622100 | -1.49537800 |
| C  | -3.53259500 | -1.67728800 | 2.16396900  |
| C  | -1.23781800 | -2.42148800 | 1.72529400  |
| N  | 2.34224300  | -2.03765500 | 0.96439900  |
| N  | 3.32217000  | 0.69476100  | 0.94115600  |
| C  | 0.03233300  | -1.89322300 | 1.52720700  |
| C  | -0.91915900 | 1.63033600  | 2.07832300  |
| C  | -3.03428200 | 2.91636200  | 2.19602300  |
| C  | -1.45942900 | 3.25491900  | 0.26676000  |
| C  | -4.84323100 | 2.10499400  | -0.19432700 |
| C  | -5.04175500 | -2.26667700 | -1.08838900 |
| C  | -6.32504500 | -0.18737800 | -1.40136100 |
| C  | -4.40699400 | -0.63909900 | -2.92983900 |
| C  | -3.37271200 | -1.27378500 | 3.62161500  |
| C  | -1.32548200 | -3.75668400 | 2.16300300  |
| C  | 1.20028900  | -2.65570100 | 1.48608100  |
| C  | 3.63010800  | -2.68271500 | 1.12065700  |
| C  | 3.27013900  | 1.55927100  | 2.11795000  |



|   |             |             |             |
|---|-------------|-------------|-------------|
| C | 4.07973000  | 0.71839600  | -0.14936400 |
| C | -4.74204100 | 3.03046700  | -1.23676600 |
| C | -5.89339000 | 2.20379800  | 0.72305200  |
| C | -0.14787900 | -4.49741700 | 2.27332300  |
| C | 1.10669600  | -3.99036300 | 1.91573000  |
| C | 4.18007000  | -2.64681800 | 2.53892600  |
| C | 2.41317800  | 0.82193000  | 3.14907300  |
| C | 2.61888600  | 2.89799900  | 1.75492700  |
| C | 4.65977600  | 1.79388200  | 2.71329100  |
| N | 3.64753900  | -0.26366700 | -0.95066200 |
| C | 5.14868800  | 1.70299500  | -0.45143000 |
| C | -5.68878100 | 4.04563500  | -1.36124300 |
| C | -6.83477500 | 3.22003900  | 0.59703100  |
| C | 3.98041600  | -0.55362800 | -2.35172400 |
| C | 6.47630400  | 1.42390500  | -0.10999500 |
| C | 4.83314700  | 2.91855400  | -1.06607400 |
| C | -6.73532600 | 4.14203500  | -0.44573000 |
| C | 3.41917000  | -1.94230500 | -2.64311600 |
| C | 5.49211000  | -0.57742600 | -2.58381200 |
| C | 3.30788100  | 0.47003000  | -3.27081900 |
| C | 7.47744900  | 2.35084100  | -0.38334300 |
| C | 5.83888400  | 3.84379400  | -1.33957200 |
| C | 7.16064700  | 3.56194900  | -0.99914500 |
| H | -2.28822000 | -4.22037900 | 2.38463800  |
| H | -0.21104600 | -5.53555600 | 2.61151600  |
| H | 1.97992300  | -4.64258300 | 1.94956400  |
| H | 3.56160500  | -3.72913100 | 0.76867600  |
| H | 4.33621700  | -2.18474500 | 0.43937200  |
| H | 4.38084500  | -1.61089600 | 2.84912500  |
| H | 3.46823600  | -3.08312300 | 3.25560100  |
| H | 5.12245600  | -3.21276700 | 2.60694100  |
| H | 1.42985000  | 0.56010800  | 2.73568100  |

|   |             |             |             |
|---|-------------|-------------|-------------|
| H | 2.89742900  | -0.11095600 | 3.46759300  |
| H | 2.25364000  | 1.45439500  | 4.03443000  |
| H | 2.46186400  | 3.50913100  | 2.65702900  |
| H | 3.25692200  | 3.47022800  | 1.06620200  |
| H | 1.64521500  | 2.73300800  | 1.27244100  |
| H | 5.17489700  | 0.83718400  | 2.88848500  |
| H | 5.29068900  | 2.41731000  | 2.06639600  |
| H | 4.55942700  | 2.30840100  | 3.68074300  |
| H | 3.86560500  | -2.69833400 | -1.98019600 |
| H | 2.33127300  | -1.95520800 | -2.50186000 |
| H | 3.62602600  | -2.22547000 | -3.68521600 |
| H | 5.69294500  | -0.96857000 | -3.59225900 |
| H | 5.94507000  | 0.41997100  | -2.51923100 |
| H | 5.99127000  | -1.23789700 | -1.85799200 |
| H | 2.22638100  | 0.51383100  | -3.05839600 |
| H | 3.73878300  | 1.47181300  | -3.12605300 |
| H | 3.45088100  | 0.19097600  | -4.32605600 |
| H | 6.71960300  | 0.47393300  | 0.37071200  |
| H | 8.51217100  | 2.12652700  | -0.11473900 |
| H | 7.94765500  | 4.28832900  | -1.21437900 |
| H | 5.58656000  | 4.79036500  | -1.82282600 |
| H | 3.79680800  | 3.13576500  | -1.33364500 |
| H | -0.43158100 | 2.41190100  | 2.67816600  |
| H | -1.29506900 | 0.84798600  | 2.75222400  |
| H | -0.17286100 | 1.18163600  | 1.40756500  |
| H | -3.79353400 | 3.50598000  | 1.66719300  |
| H | -3.54414000 | 2.17558700  | 2.83099000  |
| H | -2.47975500 | 3.60242500  | 2.85405700  |
| H | -0.77136500 | 2.74792900  | -0.42592600 |
| H | -2.25324700 | 3.74480000  | -0.31612700 |
| H | -0.91055400 | 4.03752100  | 0.81407700  |
| H | -5.54449200 | -2.34955600 | -0.11328000 |

|   |             |             |             |
|---|-------------|-------------|-------------|
| H | -5.62816300 | -2.83050200 | -1.82906300 |
| H | -4.05559700 | -2.73370300 | -1.00181000 |
| H | -6.37383500 | 0.84430600  | -1.77163300 |
| H | -7.00164600 | -0.79553100 | -2.02066400 |
| H | -6.70664900 | -0.20711600 | -0.37031100 |
| H | -3.36809000 | -0.98671200 | -3.00586100 |
| H | -5.03292700 | -1.19837100 | -3.64233200 |
| H | -4.42366000 | 0.42381500  | -3.21764000 |
| H | -3.92376600 | 2.94469900  | -1.95534500 |
| H | -5.60811700 | 4.76419300  | -2.18005100 |
| H | -7.47673300 | 4.93828200  | -0.54410500 |
| H | -7.65287000 | 3.29386700  | 1.31709200  |
| H | -5.96638400 | 1.48188500  | 1.53937500  |
| H | -4.28349600 | -1.03793200 | 1.67784500  |
| H | -3.94708100 | -2.70328500 | 2.10881600  |
| H | -3.06249900 | -0.22106200 | 3.70450200  |
| H | -4.31869000 | -1.39863800 | 4.17206500  |
| H | -2.60739600 | -1.88948000 | 4.11846500  |
| H | 0.10287000  | -0.83108900 | 1.28573000  |
| P | -0.07115100 | 0.06538600  | -1.28312500 |
| C | -1.12373800 | -1.34084200 | -1.39002100 |
| C | -0.84922100 | -2.59931900 | -2.21747800 |
| C | 0.22018700  | -3.44716100 | -1.51868600 |
| H | 0.54639800  | -4.28100400 | -2.16371100 |
| H | 1.10381400  | -2.85032900 | -1.25884400 |
| H | -0.16976600 | -3.86778300 | -0.58119000 |
| C | -0.36423400 | -2.18564000 | -3.61040400 |
| H | 0.46604400  | -1.46603800 | -3.53416500 |
| H | -0.02232400 | -3.05662200 | -4.19382800 |
| H | -1.17166300 | -1.68699900 | -4.17009300 |
| C | -2.07552300 | -3.49815800 | -2.36836900 |
| H | -2.43491600 | -3.82975000 | -1.38200100 |

|   |             |             |             |
|---|-------------|-------------|-------------|
| H | -2.89887600 | -2.99858100 | -2.89608200 |
| H | -1.81348300 | -4.40155600 | -2.94352000 |

IV.2 TS 2-3

0 1

|    |             |             |             |
|----|-------------|-------------|-------------|
| Si | 1.98631800  | -0.80403600 | 0.35156600  |
| N  | 3.01243300  | 0.06559200  | -0.95814000 |
| N  | 3.55953800  | 0.03207800  | 1.12916900  |
| N  | 2.53937400  | -2.53608800 | 0.47730500  |
| Si | -1.73166700 | -0.22434100 | 0.07365200  |
| C  | 2.85253300  | 0.33372900  | -2.39249500 |
| C  | 3.81488300  | 0.60706700  | -0.03363700 |
| C  | 4.00721500  | 0.38029300  | 2.48063400  |
| C  | 3.80634500  | -3.17601300 | 0.70685100  |
| C  | 1.60690000  | -3.00912800 | -0.43305500 |
| N  | -1.32428600 | -1.01952500 | -1.48767300 |
| N  | -2.75459500 | 1.31093000  | -0.23895500 |
| C  | 0.55923800  | -2.05283500 | -0.46006600 |
| C  | 2.65352100  | -1.01249200 | -3.08996800 |
| C  | 4.06577100  | 1.00579000  | -3.03751600 |
| C  | 1.61356200  | 1.21172500  | -2.56862300 |
| C  | 4.75326000  | 1.73559900  | -0.25927000 |
| C  | 3.30710500  | -0.59395600 | 3.42684900  |
| C  | 5.52175800  | 0.20429600  | 2.61553400  |
| C  | 3.59034100  | 1.80549200  | 2.85837600  |
| C  | 4.84186300  | -2.95935400 | -0.39128700 |
| C  | 1.65315000  | -4.04947700 | -1.36100900 |
| C  | -0.36953600 | -2.01727400 | -1.52225900 |
| C  | -2.16898600 | -0.82789600 | -2.65061900 |
| C  | -2.46596100 | 2.75596700  | -0.17005200 |
| C  | -3.91669900 | 0.64702600  | -0.09104900 |
| C  | 4.25117300  | 3.04113500  | -0.27308000 |

|   |             |             |             |
|---|-------------|-------------|-------------|
| C | 6.11551400  | 1.51278800  | -0.46992600 |
| C | 0.66931600  | -4.04427600 | -2.36330000 |
| C | -0.30095900 | -3.04800400 | -2.48799000 |
| C | -1.45244600 | -0.20732500 | -3.83953700 |
| C | -1.22793300 | 3.00320200  | -1.03339000 |
| C | -2.19147700 | 3.14260800  | 1.28588600  |
| C | -3.59675700 | 3.62327200  | -0.72680300 |
| N | -3.64938300 | -0.63647000 | 0.02716500  |
| C | -5.26530700 | 1.26059300  | -0.00995700 |
| C | 5.10893400  | 4.11413800  | -0.49958500 |
| C | 6.96966000  | 2.58836700  | -0.70201400 |
| C | -4.53157900 | -1.80880900 | -0.05008200 |
| C | -6.00938300 | 1.54942500  | -1.15723900 |
| C | -5.79213600 | 1.55555800  | 1.25128800  |
| C | 6.46824300  | 3.88919300  | -0.71740400 |
| C | -3.61904700 | -3.03386700 | -0.15418800 |
| C | -5.42563700 | -1.77017900 | -1.29583400 |
| C | -5.42706500 | -1.92066100 | 1.18810500  |
| C | -7.26677600 | 2.13493400  | -1.04291000 |
| C | -7.04865600 | 2.14685800  | 1.36143500  |
| C | -7.78704800 | 2.43784700  | 0.21536200  |
| H | 2.44744600  | -4.79820400 | -1.36346100 |
| H | 0.68591400  | -4.84101900 | -3.11271800 |
| H | -1.00352500 | -3.09484900 | -3.32059800 |
| H | -2.62948100 | -1.78776800 | -2.95157600 |
| H | -3.00250900 | -0.17334600 | -2.36413700 |
| H | -1.11947500 | 0.81245100  | -3.60195100 |
| H | -0.56650200 | -0.79230800 | -4.12670400 |
| H | -2.12659900 | -0.15693800 | -4.70896100 |
| H | -0.38776900 | 2.38987000  | -0.68103300 |
| H | -1.43697100 | 2.74971700  | -2.08414600 |
| H | -0.94217300 | 4.06449300  | -0.98264700 |

|   |             |             |             |
|---|-------------|-------------|-------------|
| H | -1.94459100 | 4.21309300  | 1.35963300  |
| H | -3.08016000 | 2.95291100  | 1.90799200  |
| H | -1.34715100 | 2.56037000  | 1.68615400  |
| H | -3.88815900 | 3.30391700  | -1.73828700 |
| H | -4.49036900 | 3.63391700  | -0.09074300 |
| H | -3.22810000 | 4.65739100  | -0.79544100 |
| H | -3.06067200 | -3.03734700 | -1.10014100 |
| H | -2.88143700 | -3.05573900 | 0.65849400  |
| H | -4.21833400 | -3.95449700 | -0.10449500 |
| H | -5.94716700 | -2.73367800 | -1.39896500 |
| H | -6.19124000 | -0.98631200 | -1.22694700 |
| H | -4.83277500 | -1.60876500 | -2.20660800 |
| H | -4.83101900 | -1.95225600 | 2.10750900  |
| H | -6.12424000 | -1.07337100 | 1.25090100  |
| H | -6.02497400 | -2.84295200 | 1.13169000  |
| H | -5.59634400 | 1.32139100  | -2.14206700 |
| H | -7.84353400 | 2.35990500  | -1.94282800 |
| H | -8.77253000 | 2.90103700  | 0.30241600  |
| H | -7.45277600 | 2.38022800  | 2.34901400  |
| H | -5.20875000 | 1.32389000  | 2.14542300  |
| H | 2.49264700  | -0.85755500 | -4.16743000 |
| H | 3.54156700  | -1.64745800 | -2.95962800 |
| H | 1.78668300  | -1.55101900 | -2.69191900 |
| H | 4.22138100  | 2.03852000  | -2.70340600 |
| H | 4.98758500  | 0.43575800  | -2.85098000 |
| H | 3.90120100  | 1.02950700  | -4.12488000 |
| H | 0.74294000  | 0.74239300  | -2.08880800 |
| H | 1.76839800  | 2.19487900  | -2.09894700 |
| H | 1.39346600  | 1.36734000  | -3.63576900 |
| H | 3.57381900  | -1.63606200 | 3.20061800  |
| H | 3.59002000  | -0.38288800 | 4.46820400  |
| H | 2.21739600  | -0.49072400 | 3.33765200  |

|   |             |             |             |
|---|-------------|-------------|-------------|
| H | 6.07401300  | 0.94833000  | 2.02605700  |
| H | 5.81907500  | 0.32441200  | 3.66842700  |
| H | 5.82519900  | -0.80105300 | 2.28514800  |
| H | 2.51016900  | 1.93420600  | 2.68431900  |
| H | 3.80070500  | 1.98935800  | 3.92312700  |
| H | 4.13889300  | 2.55729700  | 2.27465800  |
| H | 3.18443100  | 3.20707500  | -0.10467200 |
| H | 4.71315000  | 5.13224200  | -0.50785100 |
| H | 7.13968900  | 4.73160100  | -0.89901100 |
| H | 8.03345700  | 2.40892600  | -0.87327600 |
| H | 6.50289900  | 0.49147600  | -0.46379500 |
| H | 4.21198000  | -2.80786200 | 1.66215200  |
| H | 3.63549000  | -4.25831500 | 0.85111000  |
| H | 5.08251300  | -1.89070100 | -0.49018700 |
| H | 5.77286700  | -3.50282700 | -0.16499400 |
| H | 4.46972400  | -3.30974500 | -1.36545000 |
| P | 0.35449600  | 0.59649400  | 1.11100000  |
| C | -0.88570100 | -0.69607900 | 1.54183000  |
| C | -1.03164100 | -1.30610300 | 2.93733000  |
| C | -2.46440500 | -1.75996000 | 3.20251100  |
| H | -2.56900500 | -2.15370900 | 4.22727400  |
| H | -3.16323400 | -0.91772500 | 3.08350100  |
| H | -2.76635900 | -2.55803600 | 2.51157000  |
| C | -0.67563800 | -0.27018600 | 4.00855500  |
| H | -1.36710200 | 0.58589200  | 3.96097400  |
| H | -0.73202500 | -0.71396000 | 5.01673900  |
| H | 0.33597900  | 0.13169400  | 3.85576600  |
| C | -0.09760000 | -2.51777300 | 3.06822200  |
| H | -0.40139500 | -3.31962100 | 2.37719200  |
| H | 0.93932300  | -2.25228800 | 2.81394800  |
| H | -0.10396400 | -2.92503800 | 4.09338100  |
| H | -0.09318700 | -1.70682700 | 0.56653200  |

## IV.2 TS 0-4

0 1

|    |             |             |             |
|----|-------------|-------------|-------------|
| Si | -1.70980700 | 0.43562500  | -0.15440300 |
| N  | -3.30154200 | -0.26230100 | -1.00046400 |
| N  | -3.09913100 | 0.04662700  | 1.10767300  |
| N  | -1.97588400 | 2.19355000  | -0.35181900 |
| Si | 2.23759500  | 0.84382600  | 0.62842500  |
| C  | -3.48847500 | -0.90128700 | -2.30305100 |
| C  | -3.84151400 | -0.55721200 | 0.18744000  |
| C  | -3.19808400 | 0.15965800  | 2.55675200  |
| C  | -3.28391300 | 2.80684800  | -0.38081700 |
| C  | -0.83657700 | 3.01039300  | -0.32805900 |
| N  | 2.72324900  | 2.46693200  | 0.25612300  |
| N  | 2.64393400  | -0.41085400 | -0.67777500 |
| C  | 0.41548500  | 2.40454200  | -0.14716400 |
| C  | -2.50453800 | -0.22041200 | -3.25688300 |
| C  | -4.91407000 | -0.69444300 | -2.82050800 |
| C  | -3.15821700 | -2.39697600 | -2.24188500 |
| C  | -4.99168600 | -1.46256100 | 0.44746100  |
| C  | -2.26088800 | 1.30335500  | 2.95426500  |
| C  | -4.62368000 | 0.49766300  | 2.99645600  |
| C  | -2.72432900 | -1.13287000 | 3.23085300  |
| C  | -3.76727400 | 3.21676100  | -1.76581700 |
| C  | -0.90151200 | 4.41351400  | -0.48520600 |
| C  | 1.55735900  | 3.20478700  | -0.03959200 |
| C  | 4.04219700  | 3.02950700  | 0.13683200  |
| C  | 2.14551700  | -0.78116400 | -2.01277500 |
| C  | 3.67783500  | -0.85983000 | 0.03449000  |
| C  | -4.78540800 | -2.77780700 | 0.87754700  |
| C  | -6.29917400 | -0.99140400 | 0.28514600  |
| C  | 0.26301800  | 5.17834500  | -0.40596100 |



|   |             |             |             |
|---|-------------|-------------|-------------|
| C | 1.51008100  | 4.60234300  | -0.17233400 |
| C | 4.48988000  | 3.20720200  | -1.30833400 |
| C | 1.52671200  | 0.47863600  | -2.61775800 |
| C | 1.07529300  | -1.86499600 | -1.86306800 |
| C | 3.27037100  | -1.26234400 | -2.93139700 |
| N | 3.81488300  | -0.04664000 | 1.09296800  |
| C | 4.47873100  | -2.07261300 | -0.24947200 |
| C | -5.87193300 | -3.60940700 | 1.13975600  |
| C | -7.38402500 | -1.82217300 | 0.55387300  |
| C | 4.48364400  | -0.26593000 | 2.38028200  |
| C | 5.79173900  | -1.95586100 | -0.71654900 |
| C | 3.91647200  | -3.34123600 | -0.07163400 |
| C | -7.17252400 | -3.13264700 | 0.98109300  |
| C | 4.09969700  | 0.92201800  | 3.26455000  |
| C | 6.00413900  | -0.29459300 | 2.21380600  |
| C | 3.99086200  | -1.55842200 | 3.03706500  |
| C | 6.53089600  | -3.09789500 | -1.01275600 |
| C | 4.66311100  | -4.48137600 | -0.35784400 |
| C | 5.96866700  | -4.36128800 | -0.83274800 |
| H | -1.84658600 | 4.91989500  | -0.68873600 |
| H | 0.19010100  | 6.26294900  | -0.52865800 |
| H | 2.40191000  | 5.22767400  | -0.08664600 |
| H | 4.08509200  | 3.99935400  | 0.66613000  |
| H | 4.74920700  | 2.36526200  | 0.65744100  |
| H | 4.54095600  | 2.23184000  | -1.81746600 |
| H | 3.77785700  | 3.83724500  | -1.86215300 |
| H | 5.48377100  | 3.67900800  | -1.36333900 |
| H | 0.76760800  | 0.90852500  | -1.94280100 |
| H | 2.29330100  | 1.25184700  | -2.77779500 |
| H | 1.06445600  | 0.24091300  | -3.58738200 |
| H | 0.63548900  | -2.10178400 | -2.84414000 |
| H | 1.50411200  | -2.79139500 | -1.45260700 |

|   |             |             |             |
|---|-------------|-------------|-------------|
| H | 0.27359500  | -1.50898900 | -1.19598900 |
| H | 4.09713100  | -0.53570200 | -2.95633000 |
| H | 3.67333000  | -2.24202900 | -2.64355200 |
| H | 2.87246500  | -1.35375700 | -3.95267700 |
| H | 4.43908900  | 1.87125900  | 2.82571300  |
| H | 3.00691200  | 0.97597400  | 3.39127500  |
| H | 4.55714500  | 0.81782000  | 4.25902300  |
| H | 6.48776400  | -0.31681000 | 3.20197600  |
| H | 6.33664200  | -1.18165200 | 1.65842300  |
| H | 6.35208800  | 0.60375300  | 1.68182300  |
| H | 2.89366200  | -1.54411800 | 3.12621700  |
| H | 4.28421900  | -2.44381300 | 2.45547900  |
| H | 4.41853200  | -1.66204200 | 4.04592300  |
| H | 6.22336900  | -0.96386300 | -0.86505600 |
| H | 7.55184500  | -3.00065200 | -1.38860000 |
| H | 6.55062200  | -5.25638800 | -1.06402600 |
| H | 4.22117700  | -5.46959800 | -0.21202500 |
| H | 2.89281600  | -3.42955300 | 0.29811300  |
| H | -2.57830600 | -0.66088800 | -4.26213600 |
| H | -2.70483000 | 0.85733900  | -3.33089000 |
| H | -1.47149900 | -0.34396700 | -2.89772400 |
| H | -5.65031000 | -1.23773100 | -2.21272700 |
| H | -5.17544300 | 0.37422200  | -2.81236300 |
| H | -4.99625300 | -1.06148100 | -3.85500400 |
| H | -2.14561000 | -2.54293300 | -1.83566600 |
| H | -3.87259400 | -2.94201800 | -1.60880900 |
| H | -3.19532700 | -2.84109700 | -3.24884900 |
| H | -2.57389500 | 2.24906300  | 2.48995100  |
| H | -2.25219600 | 1.43020900  | 4.04688300  |
| H | -1.23018000 | 1.09555500  | 2.62476800  |
| H | -5.32225100 | -0.32630800 | 2.79566700  |
| H | -4.64253100 | 0.69935600  | 4.07821800  |

|   |             |             |             |
|---|-------------|-------------|-------------|
| H | -4.98501400 | 1.39658400  | 2.47421200  |
| H | -1.71793800 | -1.39545000 | 2.87139700  |
| H | -2.68362200 | -1.00626700 | 4.32393900  |
| H | -3.40520800 | -1.96787400 | 3.01269900  |
| H | -3.76564800 | -3.15002000 | 0.99741000  |
| H | -5.70137600 | -4.63664200 | 1.47042400  |
| H | -8.02387600 | -3.78442100 | 1.19067800  |
| H | -8.40114200 | -1.44342900 | 0.42968600  |
| H | -6.45928600 | 0.03727400  | -0.04553500 |
| H | -4.00655400 | 2.09686600  | 0.05263700  |
| H | -3.29044200 | 3.68665300  | 0.28997000  |
| H | -3.88930600 | 2.33073500  | -2.40466900 |
| H | -4.74067600 | 3.73026800  | -1.70657900 |
| H | -3.05354700 | 3.89181800  | -2.26032300 |
| H | 0.76428000  | 1.01695800  | 0.93559100  |

#### IV.2 TS 1-5

0 1

|    |             |             |             |
|----|-------------|-------------|-------------|
| Si | -1.96683100 | -0.03703900 | 0.04666600  |
| N  | -3.30157400 | -1.30537200 | -0.34292200 |
| N  | -3.85662900 | 0.65097200  | 0.38582000  |
| N  | -1.63947400 | 0.90404800  | -1.40197200 |
| Si | 2.59434400  | 0.89081900  | 0.23471500  |
| C  | -3.24954200 | -2.74415700 | -0.64881300 |
| C  | -4.32526100 | -0.52766000 | 0.05725700  |
| C  | -4.57017100 | 1.91303900  | 0.60256500  |
| C  | -2.50268000 | 0.75736100  | -2.55948000 |
| C  | -0.68685700 | 1.95408600  | -1.43218500 |
| N  | 2.76176300  | 2.49929200  | -0.41506800 |
| N  | 3.26752300  | -0.50647000 | -0.78016000 |
| C  | 0.58276500  | 1.79621100  | -0.88129000 |
| C  | -2.11696000 | -2.95224200 | -1.66023800 |

|   |             |             |             |
|---|-------------|-------------|-------------|
| C | -4.53214900 | -3.27024300 | -1.29950700 |
| C | -2.98157300 | -3.53885200 | 0.63395000  |
| C | -5.74210600 | -0.96314200 | 0.15786200  |
| C | -3.51009900 | 2.98040100  | 0.86854800  |
| C | -5.35366100 | 2.32201500  | -0.65008300 |
| C | -5.52364900 | 1.83441200  | 1.79953300  |
| C | -1.74083400 | 0.40624100  | -3.82833700 |
| C | -1.00406500 | 3.17542600  | -2.07705900 |
| C | 1.50808400  | 2.84797600  | -0.95786000 |
| C | 3.94953000  | 3.26350700  | -0.68842400 |
| C | 2.87337400  | -1.32865600 | -1.93665000 |
| C | 4.34850400  | -0.58299700 | 0.00305200  |
| C | -6.19262000 | -1.49814500 | 1.36926100  |
| C | -6.62450600 | -0.85747100 | -0.92083400 |
| C | -0.07254700 | 4.20776600  | -2.12305200 |
| C | 1.19944600  | 4.07315300  | -1.56087100 |
| C | 4.46673800  | 3.08478700  | -2.11082200 |
| C | 1.64501300  | -0.67953300 | -2.56663200 |
| C | 2.50243600  | -2.74547600 | -1.48715200 |
| C | 4.00196000  | -1.36754100 | -2.96969700 |
| N | 4.29111100  | 0.44585800  | 0.85956700  |
| C | 5.39560200  | -1.63278300 | -0.02173800 |
| C | -7.51073200 | -1.92923100 | 1.49651800  |
| C | -7.94298400 | -1.28464900 | -0.78872700 |
| C | 4.98467600  | 0.67584700  | 2.13178100  |
| C | 6.62637600  | -1.36964500 | -0.63257700 |
| C | 5.17205900  | -2.87806500 | 0.57519200  |
| C | -8.38824800 | -1.82326600 | 0.41810600  |
| C | 4.31441300  | 1.89463300  | 2.76988800  |
| C | 6.46555300  | 0.97597900  | 1.89313400  |
| C | 4.82310800  | -0.51966000 | 3.07514800  |
| C | 7.61951800  | -2.34569900 | -0.65401100 |

|   |             |             |             |
|---|-------------|-------------|-------------|
| C | 6.17092200  | -3.84864000 | 0.55892900  |
| C | 7.39347000  | -3.58547900 | -0.05753600 |
| H | -1.97316200 | 3.31954700  | -2.56000000 |
| H | -0.34188200 | 5.14486800  | -2.61864800 |
| H | 1.91786700  | 4.89455000  | -1.61709700 |
| H | 3.75748100  | 4.33304000  | -0.48726000 |
| H | 4.73267200  | 2.95811000  | 0.02210600  |
| H | 4.74176200  | 2.03301900  | -2.28812200 |
| H | 3.69402400  | 3.35692900  | -2.84530900 |
| H | 5.35425100  | 3.71055700  | -2.29560700 |
| H | 0.80928400  | -0.61444700 | -1.85437900 |
| H | 1.85937400  | 0.34454900  | -2.90247700 |
| H | 1.32549400  | -1.27592300 | -3.43423400 |
| H | 2.04869400  | -3.29431500 | -2.32598500 |
| H | 3.38139000  | -3.31367800 | -1.15427300 |
| H | 1.77080600  | -2.70285700 | -0.66595200 |
| H | 4.28723500  | -0.34658800 | -3.26590000 |
| H | 4.89301500  | -1.88849800 | -2.59339900 |
| H | 3.65910100  | -1.89967400 | -3.86947800 |
| H | 4.39267400  | 2.78075000  | 2.12442800  |
| H | 3.24620100  | 1.69947600  | 2.95352500  |
| H | 4.79155600  | 2.12587300  | 3.73312700  |
| H | 6.95037700  | 1.25386900  | 2.84106400  |
| H | 6.99486800  | 0.10264800  | 1.48809800  |
| H | 6.58303800  | 1.81315500  | 1.18858900  |
| H | 3.75788300  | -0.77168400 | 3.19186500  |
| H | 5.35663600  | -1.40559200 | 2.70523900  |
| H | 5.22980500  | -0.27466000 | 4.06798200  |
| H | 6.79732200  | -0.39695600 | -1.09919300 |
| H | 8.57547600  | -2.13582200 | -1.13891100 |
| H | 8.17388600  | -4.34975300 | -0.07239700 |
| H | 5.99154700  | -4.81725900 | 1.03085200  |

|   |             |             |             |
|---|-------------|-------------|-------------|
| H | 4.21446100  | -3.07908100 | 1.05976900  |
| H | -1.99366300 | -4.02574200 | -1.86742000 |
| H | -2.35260100 | -2.44314700 | -2.60680200 |
| H | -1.16701400 | -2.55262900 | -1.28327500 |
| H | -5.38131100 | -3.31748700 | -0.60684800 |
| H | -4.82047000 | -2.65797200 | -2.16656200 |
| H | -4.34054100 | -4.29221600 | -1.65939300 |
| H | -2.04097800 | -3.22173900 | 1.10725500  |
| H | -3.79753300 | -3.38590500 | 1.35703400  |
| H | -2.91540600 | -4.61611900 | 0.41608400  |
| H | -2.77297400 | 3.02011800  | 0.05349100  |
| H | -3.98483600 | 3.96836500  | 0.95807400  |
| H | -2.97412800 | 2.77703100  | 1.80326600  |
| H | -6.18022800 | 1.62961100  | -0.85713200 |
| H | -5.78623200 | 3.32433100  | -0.51057800 |
| H | -4.69028400 | 2.35507100  | -1.52566800 |
| H | -4.99745400 | 1.47620000  | 2.69622400  |
| H | -5.92830000 | 2.83449000  | 2.01795400  |
| H | -6.37210300 | 1.16415600  | 1.60623200  |
| H | -5.50300400 | -1.57079800 | 2.21341200  |
| H | -7.85491700 | -2.34774700 | 2.44502500  |
| H | -9.42244200 | -2.16048600 | 0.51840800  |
| H | -8.62672600 | -1.20062300 | -1.63648500 |
| H | -6.27117800 | -0.45263900 | -1.87134500 |
| H | -3.22859200 | -0.03981700 | -2.34443700 |
| H | -3.10748300 | 1.66707800  | -2.73522300 |
| H | -1.21479200 | -0.55245300 | -3.70836000 |
| H | -2.42508900 | 0.32629400  | -4.68807800 |
| H | -0.98849200 | 1.17483800  | -4.05956500 |
| P | -0.25885400 | -1.28917400 | 0.90154000  |
| C | -1.05013700 | 0.05190700  | 1.60557400  |
| C | -0.82889500 | 0.70791700  | 2.95014300  |

|   |             |             |            |
|---|-------------|-------------|------------|
| C | -0.32388900 | 2.14042400  | 2.72222500 |
| H | -0.19982900 | 2.66155200  | 3.68602500 |
| H | 0.64991100  | 2.13181300  | 2.20969100 |
| H | -1.01014000 | 2.72294000  | 2.09474300 |
| C | 0.22103900  | -0.06141100 | 3.75235300 |
| H | 1.16925800  | -0.10978800 | 3.19295500 |
| H | 0.40802000  | 0.42946700  | 4.72089600 |
| H | -0.10316100 | -1.09664300 | 3.94145400 |
| C | -2.15057100 | 0.72028700  | 3.72480000 |
| H | -2.93385500 | 1.24438200  | 3.16173600 |
| H | -2.50113500 | -0.30830800 | 3.90527400 |
| H | -2.02977100 | 1.21933400  | 4.70052700 |
| H | 1.11580900  | 0.79502600  | 0.49063200 |

#### IV.2 TS 2-6

0 1

|    |             |             |             |
|----|-------------|-------------|-------------|
| P  | 0.18177300  | 0.66442900  | 0.74025200  |
| Si | 1.95433800  | -0.32637700 | -0.26833600 |
| C  | -0.88637900 | -0.41852400 | 1.63855900  |
| N  | 3.09216100  | 1.06338400  | -0.79705100 |
| N  | 3.68420700  | -0.59359000 | 0.44221100  |
| N  | 1.78725200  | -1.44502600 | -1.58517700 |
| Si | -2.08451300 | -0.90259400 | 0.35993000  |
| C  | -0.33865500 | -1.30722000 | 2.76646800  |
| C  | 2.87827000  | 2.41944400  | -1.32715800 |
| C  | 4.06157500  | 0.60292100  | 0.00509400  |
| C  | 4.39941800  | -1.63713400 | 1.18749900  |
| C  | 2.85899200  | -1.62404900 | -2.54714900 |
| C  | 0.66387700  | -2.31348800 | -1.61038300 |
| N  | -2.66100500 | -2.47100000 | -0.20062000 |
| N  | -2.67765300 | 0.45083400  | -0.80109000 |
| C  | -0.53457800 | -1.94555800 | -0.97589100 |

|   |             |             |             |
|---|-------------|-------------|-------------|
| C | 0.55013100  | -2.41015400 | 2.18487100  |
| C | 0.48094700  | -0.44715200 | 3.73520400  |
| C | -1.43351100 | -2.01025500 | 3.56652200  |
| C | 1.62911000  | 2.33425000  | -2.19679300 |
| C | 4.05316800  | 2.86381100  | -2.20032900 |
| C | 2.64144800  | 3.41336100  | -0.18738200 |
| C | 5.28711100  | 1.32563100  | 0.42022900  |
| C | 3.86151400  | -2.98279100 | 0.69140200  |
| C | 5.90639900  | -1.60907200 | 0.92386100  |
| C | 4.13361200  | -1.47277900 | 2.68542400  |
| C | 2.44836300  | -1.29847700 | -3.97478900 |
| C | 0.76711400  | -3.55604500 | -2.27354300 |
| C | -1.58034200 | -2.90019300 | -0.96581400 |
| C | -3.95136200 | -3.10034800 | -0.26645400 |
| C | -2.44223600 | 0.99855400  | -2.16019300 |
| C | -3.71841300 | 0.75697500  | -0.00963500 |
| C | 5.33275100  | 1.90161900  | 1.69398200  |
| C | 6.40290800  | 1.40261200  | -0.41845500 |
| C | -0.31077700 | -4.43250500 | -2.29468300 |
| C | -1.49938000 | -4.12654900 | -1.63701400 |
| C | -4.73176300 | -2.77497400 | -1.53334300 |
| C | -1.35467400 | 0.20869000  | -2.88370500 |
| C | -2.01065100 | 2.46797800  | -2.07573100 |
| C | -3.70578200 | 0.86542000  | -3.01952100 |
| N | -3.82104400 | -0.13531100 | 0.95523500  |
| C | -4.52963200 | 2.00072300  | -0.11438200 |
| C | 6.48740000  | 2.55244800  | 2.12238500  |
| C | 7.55765600  | 2.04550500  | 0.01764300  |
| C | -4.54788300 | -0.00669300 | 2.23180400  |
| C | -5.80181800 | 2.02252900  | -0.69128000 |
| C | -4.00130900 | 3.17027600  | 0.44082100  |
| C | 7.60150300  | 2.62170200  | 1.28722800  |



|   |             |             |             |
|---|-------------|-------------|-------------|
| C | -4.73571400 | -1.41984000 | 2.78625000  |
| C | -5.95589700 | 0.58644000  | 2.09848300  |
| C | -3.72285900 | 0.86099600  | 3.19091700  |
| C | -6.53781100 | 3.20379500  | -0.71501900 |
| C | -4.74432400 | 4.34835700  | 0.42582300  |
| C | -6.01252500 | 4.36735400  | -0.15316000 |
| H | 1.68876200  | -3.84409500 | -2.77915500 |
| H | -0.21627200 | -5.38277600 | -2.82733300 |
| H | -2.33382600 | -4.83030800 | -1.63907500 |
| H | -3.82975500 | -4.19475900 | -0.16951500 |
| H | -4.53089800 | -2.78414400 | 0.60909400  |
| H | -4.96453100 | -1.69997700 | -1.57132600 |
| H | -4.14955900 | -3.02783300 | -2.43287500 |
| H | -5.68102800 | -3.33268300 | -1.57140200 |
| H | -0.38808300 | 0.25964600  | -2.37273500 |
| H | -1.62265200 | -0.85070900 | -2.98363900 |
| H | -1.23410200 | 0.63619900  | -3.89033300 |
| H | -1.61753700 | 2.80104100  | -3.04823800 |
| H | -2.84550700 | 3.12878300  | -1.80987000 |
| H | -1.22141300 | 2.58218000  | -1.31952200 |
| H | -4.04107700 | -0.18158200 | -3.04838000 |
| H | -4.52808300 | 1.49550100  | -2.66213100 |
| H | -3.47979100 | 1.17760300  | -4.05011800 |
| H | -5.49940000 | -1.96007400 | 2.20707700  |
| H | -3.80715200 | -1.99650800 | 2.75654400  |
| H | -5.07713200 | -1.37471700 | 3.83068400  |
| H | -6.48632900 | 0.41985800  | 3.04846300  |
| H | -5.95799100 | 1.66574500  | 1.90853400  |
| H | -6.52685800 | 0.08438800  | 1.30301700  |
| H | -2.66719100 | 0.55257900  | 3.16949000  |
| H | -3.76272900 | 1.91450400  | 2.87580600  |
| H | -4.12330800 | 0.79955300  | 4.21481400  |

|   |             |             |             |
|---|-------------|-------------|-------------|
| H | -6.22116100 | 1.10570900  | -1.11062300 |
| H | -7.53156900 | 3.21421100  | -1.16835400 |
| H | -6.59416500 | 5.29205700  | -0.16711300 |
| H | -4.32808200 | 5.25709400  | 0.86652900  |
| H | -3.00286500 | 3.14565500  | 0.88389300  |
| H | 1.29611000  | -1.96773700 | 1.50425000  |
| H | 1.10044000  | -2.96920300 | 2.96208800  |
| H | -0.03998400 | -3.11989500 | 1.58705000  |
| H | -0.15586400 | 0.32287500  | 4.19722000  |
| H | 0.93161900  | -1.05934600 | 4.53540300  |
| H | 1.29151600  | 0.07615500  | 3.20271000  |
| H | -2.01698100 | -2.67877500 | 2.91432400  |
| H | -0.98812400 | -2.63726900 | 4.35658500  |
| H | -2.11561600 | -1.29610300 | 4.04687200  |
| H | 1.38413400  | 3.32245600  | -2.61142000 |
| H | 1.77552700  | 1.63202200  | -3.02993100 |
| H | 0.77316300  | 1.99132000  | -1.60029500 |
| H | 4.95563500  | 3.07302400  | -1.61221500 |
| H | 4.28853700  | 2.09673900  | -2.95405000 |
| H | 3.78066900  | 3.78891100  | -2.72975900 |
| H | 1.80822800  | 3.06729700  | 0.44347400  |
| H | 3.53993200  | 3.52628200  | 0.43659000  |
| H | 2.38838900  | 4.40381100  | -0.59522100 |
| H | 4.11006800  | -3.13104300 | -0.36908300 |
| H | 4.31428500  | -3.80085400 | 1.27028400  |
| H | 2.77178100  | -3.05712500 | 0.79603500  |
| H | 6.40305900  | -0.74308600 | 1.37914300  |
| H | 6.35459000  | -2.51541400 | 1.35686200  |
| H | 6.12001400  | -1.61019200 | -0.15578000 |
| H | 3.05735100  | -1.48469900 | 2.89821900  |
| H | 4.60737300  | -2.29051500 | 3.24916800  |
| H | 4.54857300  | -0.52204800 | 3.05106500  |

|   |             |             |             |
|---|-------------|-------------|-------------|
| H | 4.45664800  | 1.84253100  | 2.34371400  |
| H | 6.51653600  | 3.00581400  | 3.11566000  |
| H | 8.50855100  | 3.12691300  | 1.62678300  |
| H | 8.43014800  | 2.09574700  | -0.63748700 |
| H | 6.36813600  | 0.94370200  | -1.40851800 |
| H | 3.68796500  | -0.96315800 | -2.25026900 |
| H | 3.26534200  | -2.65080200 | -2.49462400 |
| H | 2.13553300  | -0.24695300 | -4.05572300 |
| H | 3.28520300  | -1.46604000 | -4.67068100 |
| H | 1.60307000  | -1.92384200 | -4.29598700 |
| H | -0.18180500 | -0.38506100 | -0.54729200 |

#### IV.2 TS 6-3

O 1

|    |             |             |             |
|----|-------------|-------------|-------------|
| P  | 0.41111000  | 0.60332000  | 1.28528000  |
| Si | 1.86996500  | -0.33058000 | -0.26179100 |
| C  | -1.01890200 | -0.46669000 | 1.64421300  |
| N  | 3.01907600  | 1.06160900  | -0.68855300 |
| N  | 3.59079100  | -0.70927100 | 0.37881000  |
| N  | 1.63304200  | -1.32756600 | -1.66486300 |
| Si | -1.77087400 | -1.00836900 | 0.05701600  |
| C  | -0.87026600 | -1.38604700 | 2.87792800  |
| C  | 2.81428000  | 2.45477300  | -1.10984900 |
| C  | 4.00013700  | 0.50855400  | 0.04652300  |
| C  | 4.24027200  | -1.82941400 | 1.06312400  |
| C  | 2.65125600  | -1.39062600 | -2.70085600 |
| C  | 0.63560400  | -2.33137500 | -1.60544600 |
| N  | -2.58454400 | -2.60486000 | -0.12140700 |
| N  | -2.53004900 | 0.36677200  | -0.83854800 |
| C  | -0.56671800 | -2.10064400 | -0.94910100 |
| C  | 0.25585600  | -2.37775300 | 2.57741700  |
| C  | -0.49712900 | -0.56530300 | 4.11720400  |

|   |             |             |             |
|---|-------------|-------------|-------------|
| C | -2.14564200 | -2.16327300 | 3.19291400  |
| C | 1.47904600  | 2.46387200  | -1.84720500 |
| C | 3.92223400  | 2.89911900  | -2.06540700 |
| C | 2.73229200  | 3.38745900  | 0.10083300  |
| C | 5.25503800  | 1.15935200  | 0.48720400  |
| C | 3.44908900  | -3.07957900 | 0.67236200  |
| C | 5.68807700  | -1.99335700 | 0.59913000  |
| C | 4.18723900  | -1.62626600 | 2.57948200  |
| C | 2.10032300  | -1.14826500 | -4.09649400 |
| C | 0.83630900  | -3.59538700 | -2.21014100 |
| C | -1.53696000 | -3.12928100 | -0.85845300 |
| C | -3.85950400 | -3.23683300 | 0.03997100  |
| C | -2.42638900 | 0.74180400  | -2.28119400 |
| C | -3.59700800 | 0.84995700  | -0.07588300 |
| C | 5.34494800  | 1.65909700  | 1.79097900  |
| C | 6.35407600  | 1.25378000  | -0.37235200 |
| C | -0.15082500 | -4.57577000 | -2.13472400 |
| C | -1.35949600 | -4.37766400 | -1.46068000 |
| C | -4.82197300 | -2.98142500 | -1.11134300 |
| C | -1.32267500 | -0.05661900 | -2.96535400 |
| C | -2.08864700 | 2.22844700  | -2.49024100 |
| C | -3.74111100 | 0.39490000  | -2.98720000 |
| N | -4.13508700 | 0.02244800  | 0.74182900  |
| C | -3.88593600 | 2.32178200  | -0.15622300 |
| C | 6.52742900  | 2.25135900  | 2.22781800  |
| C | 7.53599900  | 1.84014800  | 0.07208400  |
| C | -5.06685000 | 0.33266900  | 1.83254200  |
| C | -5.00113400 | 2.85641000  | -0.80808200 |
| C | -2.97346600 | 3.19404200  | 0.44749400  |
| C | 7.62388700  | 2.33998000  | 1.37114900  |
| C | -5.57538400 | -1.01458400 | 2.35471200  |
| C | -6.30890600 | 1.13620900  | 1.42136300  |

|   |             |             |             |
|---|-------------|-------------|-------------|
| C | -4.31732000 | 1.07133700  | 2.94721900  |
| C | -5.19239200 | 4.23472400  | -0.86949900 |
| C | -3.17180000 | 4.57123800  | 0.40119500  |
| C | -4.27841400 | 5.09674000  | -0.26477000 |
| H | 1.76039500  | -3.81799800 | -2.74367000 |
| H | 0.03293500  | -5.53798500 | -2.62148500 |
| H | -2.12080600 | -5.15858100 | -1.42092400 |
| H | -3.70585600 | -4.32372100 | 0.17276500  |
| H | -4.30925100 | -2.87499900 | 0.97343100  |
| H | -5.04539100 | -1.90614500 | -1.17354000 |
| H | -4.38690900 | -3.30291600 | -2.07088200 |
| H | -5.76954400 | -3.52478800 | -0.96616900 |
| H | -0.34825400 | 0.09394100  | -2.48368800 |
| H | -1.53250200 | -1.13288300 | -2.97035800 |
| H | -1.24391800 | 0.28004900  | -4.00962700 |
| H | -1.75052100 | 2.37752100  | -3.52696200 |
| H | -2.93862700 | 2.89854300  | -2.32416400 |
| H | -1.27901600 | 2.53611300  | -1.81716000 |
| H | -3.94889400 | -0.68077900 | -2.89670600 |
| H | -4.59232900 | 0.94438500  | -2.56402100 |
| H | -3.68040800 | 0.64919300  | -4.05673000 |
| H | -6.13949200 | -1.53783200 | 1.56757900  |
| H | -4.74293300 | -1.65731700 | 2.66267900  |
| H | -6.24258900 | -0.86962200 | 3.21773800  |
| H | -7.05412800 | 1.08245400  | 2.22981400  |
| H | -6.09325800 | 2.19539200  | 1.24347100  |
| H | -6.76648800 | 0.70946200  | 0.51542500  |
| H | -3.37679000 | 0.55449300  | 3.18271900  |
| H | -4.06652800 | 2.09615700  | 2.63836400  |
| H | -4.93656800 | 1.13017400  | 3.85589100  |
| H | -5.72643400 | 2.18947500  | -1.27707900 |
| H | -6.06343000 | 4.63754200  | -1.39177300 |

|   |             |             |             |
|---|-------------|-------------|-------------|
| H | -4.42973500 | 6.17781700  | -0.31169400 |
| H | -2.45167100 | 5.23825800  | 0.88112000  |
| H | -2.09290100 | 2.78214300  | 0.94726600  |
| H | 1.15420300  | -1.82901700 | 2.24362000  |
| H | 0.54370300  | -2.96301600 | 3.46732600  |
| H | -0.03022800 | -3.07597900 | 1.77558700  |
| H | -1.28052800 | 0.17548500  | 4.34156700  |
| H | -0.37495300 | -1.21946100 | 4.99677300  |
| H | 0.44379800  | -0.01600200 | 3.95898800  |
| H | -2.48417300 | -2.74548900 | 2.32546900  |
| H | -1.97176800 | -2.86128800 | 4.02818400  |
| H | -2.95139100 | -1.48087100 | 3.49216600  |
| H | 1.23420300  | 3.47926100  | -2.18962500 |
| H | 1.50571600  | 1.79965400  | -2.72374900 |
| H | 0.67383300  | 2.12435000  | -1.17797000 |
| H | 4.89166300  | 2.98954100  | -1.55761900 |
| H | 4.02318200  | 2.18791900  | -2.89952600 |
| H | 3.67258800  | 3.88494000  | -2.48517700 |
| H | 1.96375200  | 3.02959200  | 0.80360500  |
| H | 3.69464600  | 3.44705600  | 0.62865200  |
| H | 2.46345000  | 4.40383100  | -0.22411800 |
| H | 3.50487600  | -3.26007300 | -0.41062100 |
| H | 3.85280100  | -3.95981100 | 1.19265600  |
| H | 2.38716400  | -2.98697200 | 0.94204900  |
| H | 6.32967900  | -1.16856100 | 0.93654700  |
| H | 6.09775500  | -2.92710300 | 1.01171300  |
| H | 5.74029300  | -2.05405300 | -0.49875100 |
| H | 3.15368600  | -1.45929800 | 2.91428600  |
| H | 4.57875200  | -2.51575400 | 3.09553100  |
| H | 4.79655700  | -0.76316600 | 2.88282800  |
| H | 4.47943000  | 1.59212700  | 2.45397100  |
| H | 6.59148500  | 2.64607300  | 3.24421700  |

|   |             |             |             |
|---|-------------|-------------|-------------|
| H | 8.55173600  | 2.80098300  | 1.71727000  |
| H | 8.39445400  | 1.90567100  | -0.59999000 |
| H | 6.28404900  | 0.85361900  | -1.38597700 |
| H | 3.40602500  | -0.62351300 | -2.47005100 |
| H | 3.18611400  | -2.35779600 | -2.66441400 |
| H | 1.66604800  | -0.14039700 | -4.17353400 |
| H | 2.89712000  | -1.24126700 | -4.85057700 |
| H | 1.30979100  | -1.87252800 | -4.34108300 |
| H | -0.99545300 | 1.05575600  | 1.00873700  |

#### IV.2 Int2 – isomer 2

0 1

|    |             |             |             |
|----|-------------|-------------|-------------|
| Si | 1.62024300  | 0.39639400  | 0.49101000  |
| N  | 3.12828000  | -0.54607800 | 1.07432000  |
| N  | 3.03786500  | 0.04334000  | -1.01049600 |
| N  | 2.19150700  | 2.11352900  | 0.63891600  |
| Si | -1.61989300 | 0.39595100  | 0.49154400  |
| C  | 3.56648900  | -0.99253400 | 2.41580900  |
| C  | 3.77491300  | -0.55331900 | -0.10974700 |
| C  | 3.33378500  | 0.39033700  | -2.40513000 |
| C  | 3.56642800  | 2.55476900  | 0.66337900  |
| C  | 1.20606300  | 3.04393200  | 0.32473300  |
| N  | -2.19171400 | 2.11292400  | 0.63985200  |
| N  | -3.12804700 | -0.54636200 | 1.07432700  |
| C  | -0.00013800 | 2.76666000  | 0.94690700  |
| C  | 3.09923600  | 0.05109900  | 3.43677800  |
| C  | 5.08697700  | -1.09478600 | 2.56370000  |
| C  | 2.94660400  | -2.35447300 | 2.73570100  |
| C  | 5.08296300  | -1.21679400 | -0.35824200 |
| C  | 2.16014800  | 1.25260300  | -2.87802100 |
| C  | 4.61096100  | 1.22724500  | -2.56297000 |
| C  | 3.49419600  | -0.86202000 | -3.27689100 |

|   |             |             |             |
|---|-------------|-------------|-------------|
| C | 3.81171800  | 3.60272500  | 1.73784300  |
| C | 1.22737400  | 4.06678300  | -0.64181700 |
| C | -1.20667100 | 3.04359300  | 0.32520900  |
| C | -3.56676500 | 2.55375300  | 0.66445400  |
| C | -3.56592700 | -0.99338300 | 2.41574600  |
| C | -3.77466800 | -0.55362300 | -0.10978100 |
| C | 5.09206700  | -2.59469000 | -0.59882600 |
| C | 6.28923300  | -0.51111700 | -0.34878000 |
| C | -0.00077800 | 4.60391700  | -1.04896800 |
| C | -1.22862500 | 4.06643500  | -0.64134200 |
| C | -3.81216400 | 3.60178800  | 1.73882500  |
| C | -3.09899700 | 0.05020100  | 3.43691800  |
| C | -2.94545500 | -2.35514800 | 2.73524000  |
| C | -5.08633800 | -1.09637800 | 2.56382400  |
| N | -3.03766000 | 0.04284100  | -1.01064600 |
| C | -5.08290300 | -1.21676900 | -0.35821200 |
| C | 6.29556400  | -3.25735000 | -0.82834100 |
| C | 7.49067300  | -1.17705700 | -0.57355900 |
| C | -3.33400100 | 0.39019300  | -2.40510100 |
| C | -6.28902900 | -0.51085100 | -0.34798800 |
| C | -5.09232900 | -2.59449500 | -0.59970100 |
| C | 7.49709600  | -2.55069800 | -0.81445800 |
| C | -2.16032300 | 1.25228300  | -2.87823000 |
| C | -4.61104200 | 1.22739200  | -2.56247700 |
| C | -3.49503200 | -0.86199300 | -3.27701200 |
| C | -7.49065900 | -1.17642100 | -0.57283600 |
| C | -6.29602200 | -3.25679400 | -0.82925000 |
| C | -7.49741200 | -2.54991900 | -0.81455500 |
| H | 2.15585400  | 4.40683900  | -1.10477200 |
| H | -0.00104200 | 5.40860300  | -1.78984200 |
| H | -2.15736900 | 4.40625600  | -1.10393900 |
| H | -3.87458300 | 2.96327900  | -0.31707300 |



|   |             |             |             |
|---|-------------|-------------|-------------|
| H | -4.21267400 | 1.68536000  | 0.85132900  |
| H | -3.57588400 | 3.20152200  | 2.73607200  |
| H | -3.17665800 | 4.48567200  | 1.57771700  |
| H | -4.86264800 | 3.93256100  | 1.73214500  |
| H | -2.01268400 | 0.19532800  | 3.39537700  |
| H | -3.58446600 | 1.01860000  | 3.24987600  |
| H | -3.36912200 | -0.28110700 | 4.45057500  |
| H | -3.24746000 | -2.68421900 | 3.74142400  |
| H | -3.28234100 | -3.11271500 | 2.01146300  |
| H | -1.84751200 | -2.29204400 | 2.70186300  |
| H | -5.58810300 | -0.15903000 | 2.28294000  |
| H | -5.52720900 | -1.91711200 | 1.98558300  |
| H | -5.30657700 | -1.28456400 | 3.62491200  |
| H | -2.12322600 | 2.19369600  | -2.31218600 |
| H | -1.19772800 | 0.75203200  | -2.72143100 |
| H | -2.26472700 | 1.49128700  | -3.94677700 |
| H | -4.66902500 | 1.60310300  | -3.59526300 |
| H | -5.51687300 | 0.63726400  | -2.37625900 |
| H | -4.60669500 | 2.09444800  | -1.88927500 |
| H | -2.63248900 | -1.53455900 | -3.19982500 |
| H | -4.39265600 | -1.42693200 | -2.98784100 |
| H | -3.60743200 | -0.57031600 | -4.33244100 |
| H | -6.28739200 | 0.56171100  | -0.14511300 |
| H | -8.42956600 | -0.61841400 | -0.55568700 |
| H | -8.44171900 | -3.07015800 | -0.99052200 |
| H | -6.29421600 | -4.33279900 | -1.01743800 |
| H | -4.14994100 | -3.14625700 | -0.60223400 |
| H | 3.36972300  | -0.27980800 | 4.45046900  |
| H | 3.58420400  | 1.01967500  | 3.24936800  |
| H | 2.01285000  | 0.19569800  | 3.39539200  |
| H | 5.52813900  | -1.91554500 | 1.98571700  |
| H | 5.58823100  | -0.15730100 | 2.28234700  |

|   |             |             |             |
|---|-------------|-------------|-------------|
| H | 5.30749700  | -1.28244200 | 3.62482300  |
| H | 1.84863400  | -2.29184300 | 2.70222700  |
| H | 3.28385000  | -3.11213500 | 2.01219100  |
| H | 3.24869000  | -2.68312100 | 3.74200000  |
| H | 2.12351300  | 2.19419400  | -2.31225200 |
| H | 2.26422500  | 1.49127500  | -3.94667400 |
| H | 1.19747400  | 0.75264600  | -2.72073900 |
| H | 5.51671000  | 0.63686800  | -2.37714700 |
| H | 4.66867400  | 1.60301400  | -3.59574900 |
| H | 4.60707500  | 2.09423200  | -1.88967400 |
| H | 2.63138600  | -1.53419800 | -3.19944400 |
| H | 3.60650300  | -0.57052300 | -4.33238000 |
| H | 4.39166100  | -1.42726500 | -2.98781900 |
| H | 4.14959000  | -3.14629100 | -0.60070000 |
| H | 6.29349000  | -4.33347400 | -1.01584800 |
| H | 8.44125100  | -3.07122400 | -0.99039300 |
| H | 8.42968900  | -0.61921600 | -0.55698800 |
| H | 6.28789900  | 0.56155000  | -0.14646500 |
| H | 4.21267500  | 1.68654300  | 0.84988600  |
| H | 3.87388000  | 2.96458800  | -0.31815000 |
| H | 3.57572200  | 3.20228700  | 2.73508500  |
| H | 4.86210100  | 3.93381300  | 1.73102600  |
| H | 3.17591800  | 4.48643600  | 1.57693600  |
| H | 0.00011500  | 2.09830500  | 1.80034800  |
| P | 0.00035400  | -0.42996000 | 1.87201200  |
| C | 0.00020800  | -0.39614700 | -0.18617300 |
| C | 0.00018800  | -1.80118400 | -0.88411400 |
| C | -1.21871000 | -2.63389500 | -0.48290600 |
| H | -1.13177900 | -3.64995900 | -0.89985500 |
| H | -1.28741900 | -2.71736800 | 0.60995600  |
| H | -2.14255300 | -2.19379400 | -0.87202100 |
| C | 1.21975200  | -2.63338000 | -0.48385800 |

|   |             |             |             |
|---|-------------|-------------|-------------|
| H | 1.28959300  | -2.71653000 | 0.60895800  |
| H | 1.13280200  | -3.64958900 | -0.90044900 |
| H | 2.14304700  | -2.19303500 | -0.87399400 |
| C | -0.00045300 | -1.66237000 | -2.40307700 |
| H | -0.88260900 | -1.12126400 | -2.75350700 |
| H | 0.88075900  | -1.12016000 | -2.75422700 |
| H | -0.00003600 | -2.65587000 | -2.88169000 |

## V. References

- [1] G. Sheldrick, *Acta Cryst. A* 2008, **64**, 112-122.
- [2] G. Sheldrick, *Acta Cryst. C* 2015, **A71**, 3-8.
- [3] O. V; Dolomanov, L, J, Bourhis, R. J. Gildea, J. A. K. Howard and H. Puschmann, *J. Appl. Crystallogr.* 2009, **42**, 339-341.
- [4] M. J. Frisch, G. W. Trucks, H. B. Schlegel, G. E. Scuseria, M. A. Robb, J. R. Cheeseman, G. Scalmani, V. Barone, G. A. Petersson, H. Nakatsuji, X. Li, M. Caricato, A. V Marenich, J. Bloino, B. G. Janesko, R. Gomperts, B. Mennucci, H. P. Hratchian, J. V Ortiz, A. F. Izmaylov, J. L. Sonnenberg, D. Williams-Young, F. Ding, F. Lipparini, F. Egidi, J. Goings, B. Peng, A. Petrone, T. Henderson, D. Ranasinghe, V. G. Zakrzewski, J. Gao, N. Rega, G. Zheng, W. Liang, M. Hada, M. Ehara, K. Toyota, R. Fukuda, J. Hasegawa, M. Ishida, T. Nakajima, Y. Honda, O. Kitao, H. Nakai, T. Vreven, K. Throssell, J. A. J. Montgomery, J. E. Peralta, F. Ogliaro, M. J. Bearpark, J. J. Heyd, E. N. Brothers, K. N. Kudin, V. N. Staroverov, T. A. Keith, R. Kobayashi, J. Normand, K. Raghavachari, A. P. Rendell, J. C. Burant, S. S. Iyengar, J. Tomasi, M. Cossi, J. M. Millam, M. Klene, C. Adamo, R. Cammi, J. W. Ochterski, R. L. Martin, K. Morokuma, O. Farkas, J. B. Foresman and D. J. Fox, Gaussian 16, Revision B.01, Gaussian Inc. Wallingford CT, **2016**.
